# Supplementary material for: Hydrochemical and isotopic evidences for deciphering conceptual model of groundwater salinization processes in a coastal plain, north China
Source: Copernicus journal article supplement (doi:10.5194/hess-2017-617), 2017-11-07
Supplement: Supplementary file [file hess-2017-617-AC5-supplement.pdf]

1 Hydrochemical and isotopic evidences for deciphering conceptual model of groundwater  
2 Delineating multiple salinization processes in a coastal plain aquifer, northern China:  
3 hydrochemical and isotopic evidence

4  
5 Han Dongmei<sup>a,b</sup>, Matthew Currell<sup>c</sup>

6 *a Key Laboratory of Water Cycle & Related Land Surface Processes, Institute of Geographic Sciences and Natural Resources*  
7 *Research, Chinese Academy of Sciences, Beijing, 100101, China*

8 *b College of Resources and Environment, University of Chinese Academy of Sciences, Beijing 100049, China*

9 *c School of Engineering, RMIT University, Melbourne VIC 3000, Australia.*

10  
11 **Abstract**

12 Groundwater is ~~the an~~ important water resource for agricultural irrigation, urban ~~and tourism development~~  
13 and industrial utilization in the coastal regions of northern China. In the past five decades, coastal  
14 groundwater salinization in the Yang-Dai River ~~coastal~~ plain has become ~~more increasingly~~ serious ~~than~~  
15 ~~ever before~~ under ~~the influence of natural climate change and~~ anthropogenic activities ~~and climatic change~~.

16 It is pivotal for the scientific management of coastal water resources to accurately understand groundwater  
17 salinization processes and ~~its inducement~~ their causative factors. Hydrochemical (major ion and trace  
18 element) and stable isotopic ( $\delta^{18}\text{O}$  and  $\delta^2\text{H}$ ) analysis ~~for of the~~ different water bodies (surface water,  
19 groundwater, geothermal water, and seawater) were ~~applied conducted~~ to ~~provide a better~~ improve  
20 understanding of ~~the processes of~~ groundwater salinization processes in ~~the the plain's~~ Quaternary aquifers.

21 Saltwater intrusion due to intensive groundwater pumping is ~~the a~~ major ~~aspect process, and can be caused~~  
22 by either by vertical infiltration along ~~the riverbeds which convey saline surface water inland, at the~~  
23 downstream areas of rivers during the tide/surge period, and/or direct subsurface lateral inflow into fresh  
24 aquifer derived from intensively pumping groundwater. Trends in salinity with depth indicate that the  
25 former may be more important than previously assumed. The ~~Seawater~~ proportion of seawater in  
26 groundwater is estimated to have ~~can~~ reached up to ~13% in the shallow groundwater of a local well field.

27 End-member mixing calculations also indicate that highly mineralized geothermal water (TDS of up to  
28 10.6 g/L) with depleted stable isotope compositions and elevated strontium concentrations (>10 mg/L) with  
29 the indicator of paleoseawater relies (lower Cl/Br ratios relative to modern seawater) also locally overflows  
30 mixes with water into the ~~cold overlying~~ Quaternary aquifers. This is particularly evident in samples with  
31 elevated Sr/Cl ratios (>0.005 mass ratio). ~~Groundwater~~ Deterioration of groundwater quality by salinization  
32 can is also be also clearly exacerbated by ~~the~~ anthropogenic ~~activities~~ pollution. Nitrate contamination via  
33 intrusion of heavily polluted marine water is evident locally (e.g. in the Zaoyuan well field); however, more

widespread nitrate contamination due to other local sources such as (e.g., irrigation return flow with solution of fertilizers and/or domestic wastewater) is evident on the basis of  $\text{NO}_3/\text{Cl}$  ratios (discharge). Additionally, the interaction between surface water and groundwater can make the groundwater freshening or salinizing in different sections to locally modify the groundwater hydrochemistry. The cease of the well field and establishment of anti-tide dam in the Yang River estuary area have effective function to contain the development of saltwater intrusion. This study provides an example of how multiple geochemical indicators can delineate different salinization processes and guide the future water management practices, and provide research approaches and foundation for further investigation of seawater intrusion in this a densely populated water-stressed coastal region and similar region.

**Key words:** Groundwater salinization; Stable isotopes; Coastal aquifers, Water quality

## 1. Introduction

Coastal regions is are the key areas for the world's social and economic development. Approximately 40% of the world's population lives within 100 kilometers of the coast (UN Atlas, 2010). The worldwide coastal these areas have become increasingly urbanized, with 14 of the world's 17 largest cities located along coasts (Creel et al., 2003). China has 18,000 km of continental coastline, about and around 164 million people (about approximately 12% of the total Chinese population) live in 14 coastal provinces, and nearly 80% of these people inhabit distribute in the three coastal 'economic zones' economic regions, namely Beijing-Tianjin-Hebei economic region, the Yangtze River delta economic region and the Pearl River delta economic region (Shi, 2012). The rapid economic development and the growing population in these coastal regions have greatly increased demands for fresh water, meanwhile. Meanwhile, been they are also confronted with the threat from increased waste and sewage and other wastewater discharge into coastal ecosystems environments.

Coastal groundwater resources play crucial roles on in the social, economic and ecologic function in of the global coastal systems (IPCC, 2007). Coastal groundwater Coastal aquifers system connect with the ocean and with the continental hydro-ecological systems (Moore, 1996; Ferguson and Gleeson, 2012). Groundwater as an important freshwater resource, groundwater could may be over-extracted due to that the during periods of highest demand, which (e.g., agricultural irrigation and tourist seasons) are often the periods of lowest recharge and/or surface water availability rates (Post, 2005). In addition to occurrence of some environmental issues, such as land subsidence, contaminants transport, the over Over-exploitation of

63 groundwater can ~~therefore readily~~ result in seawater intrusion ~~in the coastal area, as well as related~~  
64 ~~environmental issues such as land subsidence~~. Seawater intrusion has become a global issue and ~~the~~ related  
65 studies can be found from ~~the~~ coastal aquifers ~~system of different countries~~ around the world, such  
66 as including Israel (Sivan et al., 2005; Yechieli et al., 2009; Mazi et al., 2014), Spain (Price and Herman,  
67 1991; Pulido-Leboeuf, 2004; Garing et al., 2013), France (Barbecot et al., 2000; de Montety et al., 2008),  
68 Italy (Giambastiani et al., 2007; Ghiglieri et al., 2012), Morocco (Bouchaou et al., 2008; El Yaouti et al.,  
69 2009), USA (Gingerich and Voss, 2002; Masterson, 2004; Langevin et al., 2010), Australia (Zhang et al.,  
70 2004; Narayan et al., 2007; Werner, 2010), China (Xue et al., 2000; Han et al., 2011, 2015), Vietnam (An  
71 et al., 2014), Indonesia (Rahmawati et al., 2013), India (Radhakrishna, 2001; Bobba, 2002) and, Brazil  
72 (Montenegro et al., 2006; Cary et al., 2015), ~~etc.~~ Werner et al. (2013) ~~gave an excellent~~ provides a  
73 comprehensive review ~~on of~~ seawater intrusion processes, investigation and management.

74 ~~A variety of approaches have been used to investigate seawater intrusion, including head measurement,~~  
75 ~~geophysical methods, geochemical methods (environmental tracers combined hydrochemical and isotope~~  
76 ~~data), conceptual and mathematical modeling (see reviews by Jones et al., 1999; Werner et al., 2013).~~

77 Seawater/saltwater intrusion is a complicated hydrogeological process, due to the impact of aquifer  
78 properties, anthropogenic activities (e.g., intensive groundwater pumping, irrigation practices), recharge  
79 rates, variable density flow, ~~between the estuary and adjacent fresh groundwater system,~~ tidal/surge activity  
80 and effects relating to global climate change, such as sea level rise (Ghassemi et al., 1993; Robinson et al.,  
81 1998; Smith and Turner, 2001; Simpson and Clement, 2004; Narayan et al., 2007; Werner and Simmons,  
82 2009; Wang et al., 2015). Understanding the complex interactions between groundwater, surface water, and  
83 seawater is thus essential for effective management of coastal water resources (Mondal et al., 2010).  
84 ~~Brockway et al. (2006) reported the negative relationship between saltwater intrusion length and river~~  
85 ~~discharge. Understanding the complex interactions between groundwater and surface water, groundwater~~  
86 ~~and seawater is essential for the effective management of water resources (Sophocleus, 2002; Mondal et al.,~~  
87 ~~2010). There was a v~~ astly different salinization patterns may arise as a result of diverse  
88 interactions result based on numerical simulations in coastal settings for the additional distance of  
89 intrusion in the Nile Delta Aquifer of Egypt and in the Bay of Bengal under the same sea level rise (Sherif  
90 and Singh, 1999; Bobba, 2002; Westbrook et al., 2005). ~~Bobba (2002) also employed numerical~~  
91 ~~simulations to demonstrate an apparent risk of saltwater intrusion in the Godavari delta, India due to sea~~  
92 level rise. Westbrook et al. (2005) defined the hyporheic transition zone of mixing between river water and

93 ~~groundwater influenced by tidal fluctuations and the contaminant distribution.~~ Modelling/Modeling  
94 ~~seawater intrusion in the Burdekin Delta irrigation area, North Queensland (Australia) has shown~~ that  
95 generally, seawater intrusion is ~~far~~ more sensitive to groundwater pumping and recharge rates and recharge  
96 ~~than to aquifer properties (e.g., hydraulic conductivity), and compared to the effects of groundwater~~  
97 ~~pumping, the effect in comparison to of tidal fluctuation and sea level rises on saltwater intrusion can be~~  
98 ~~neglected~~ (Narayan et al., 2007; Ferguson and Gleeson, 2012). However, most models of seawater intrusion  
99 require simplification of the coastal interface zone. Relatively rare few studies have focused on delineating  
100 ~~the complex~~ interactions among the surface-ground-sea-water continuums in estuarine environments, and  
101 including the effects of vertical infiltration of seawater into ~~the off-shore~~ aquifers through river channels,  
102 ~~vs as compared to the sub-surface~~ lateral landward migration of the freshwater-saltwater interface. Recent  
103 data indicate that such processes may be more important in causing historical salinization of coastal  
104 groundwater than previously appreciated (e.g. Cary et al., 2015; Lee et al., 2016; Larsen et al., 2017).

105 Additionally, groundwater in coastal aquifers may be affected by other salinization processes, such as  
106 input of anthropogenic contaminants or induced mixing with saline water from deeper or adjacent  
107 formations, which may include mineralized geothermal water or brines emplaced in the coastal zone over  
108 geologic history.

109 The data ~~of from~~ China's marine environment bulletin released on March 2015 by the State Oceanic  
110 Administration ~~People's Republic of China~~ showed that the major bays, including Bohai Bay, Liaodong  
111 Bay and, Hangzhou Bay, are ~~polluted~~ seriously polluted, with ~~the~~ inorganic nitrogen and active phosphate  
112 being ~~as~~ the major pollutants (SOA, 2015). Seawater intrusion in China is ~~the~~ most serious around in the  
113 Circum-Bohai-Sea region (Han et al., 2011; Han et al., 2016a); ~~and~~ due to the heavy marine pollution, the  
114 escalating impacts of anthropogenic activities on groundwater quality seawater intrusion in the future may  
115 ~~be~~ not simply be a case of a simple problem related to groundwater salinization simple salt-water intrusion.  
116 This region is also characterized by deep brines and geothermal waters (e.g. Han et al., 2014), which may  
117 migrate and mix with fresher groundwater under due to intensive water extraction. Depending on the  
118 specific processes involved, additional contaminants may mix with fresh groundwater resources in parallel  
119 with seawater intrusion, and in this region. It is thus likely to be more difficult to mitigate and remediate  
120 groundwater pollution ~~caused by the contaminated seawater.~~

121 A variety of approaches can be used to investigate and differentiate seawater intrusion and other  
122 salinization processes, including time-series water level and salinity measurements, geophysical methods,

123 conceptual and mathematical modeling as well as geochemical methods (see reviews by Jones et al., 1999;  
124 Werner et al., 2013). Geochemical techniques are particularly valuable in areas where the dynamics of  
125 saline intrusion are complicated and may involve long-term processes pre-dating accurate water level  
126 records, or where multiple salinization processes may be occurring simultaneously. These techniques  
127 typically employ the use of major ion ratios such as Cl/Br and Cl/Na, which are indicative of solute origins  
128 (Edmunds, 1996; Jones et al., 1999). Other ionic ratios, involving Mg, Ca, Na, HCO<sub>3</sub> and SO<sub>4</sub>, and  
129 characterization of water ‘types’ can also be useful in determining the geochemical evolution of coastal  
130 groundwater, for example, indicating freshening or salinization, due to commonly associated ion exchange  
131 and redox reactions (Anderson et al., 2005; Walraevens, 2007). Trace elements such as strontium, lithium  
132 and boron can provide additional valuable information about sources of salinity and mixing between  
133 various end-members, as particular waters can have distinctive concentrations (and/or isotopic  
134 compositions) of these elements (e.g., Vengosh et al., 1999). Stable isotopes of water ( $\delta^{18}\text{O}$  and  $\delta^2\text{H}$ ) are  
135 also commonly used in such studies, as they are sensitive indicators of water and salinity sources, allowing  
136 seawater to be distinguished from other salt sources (e.g., Currell et al., 2015).

137 This study ~~will take~~examines the Yang-Dai River coastal plain in Qinhuangdao City, Hebei province  
138 ~~of~~ north China, specifically focusing on salinization of fresh groundwater caused by groundwater  
139 exploitation in the Zaoyuan well field and surrounding areas. ~~The study as an example to~~ investigates  
140 groundwater salinization processes and interactions among surface water, ~~groundwater and~~ seawater and  
141 ~~geothermal groundwater, and~~ in a dynamic environment, with significant pressure on water resources ~~the~~  
142 ~~seawater intrusion caused by groundwater exploitation in Zaoyuan well field.~~ Qinhuangdao is an important  
143 port and tourist city of northern China. In the past 30 years, many ~~previous~~ studies ~~had done to~~ have  
144 investigated ~~distribution of~~ seawater intrusion and its influence factors in the region using  
145 hydrochemical analysis ~~of groundwater~~ (Xu, 1986; Yang et al., 1994, 2008; Chen and Ma, 2002; Sun and  
146 Yang, 2007; Zhang, 2012) and numerical simulations (Han, 1990; Bao, 2005; Zuo, 2009). However, these  
147 studies have yet to provide clear resolution of the different mechanisms contributing to salinization, and  
148 have typically ignored the role of anthropogenic pollution and groundwater-surface water interaction. This  
149 study is thus a continuation of previous investigations of the ~~coastal plain aquifers in Qinhuangdao region,~~  
150 using a range of ~~h~~-Hydrochemical and stable isotopic ~~compositions of collected water samples were~~  
151 analyzed for ~~data to making up the knowledge gap of surface, ground and sea water interactions in this~~  
152 region. This study aims to describe the conceptual model of the complex processes for the groundwater

153 ~~salinization of the coastal aquifers, to reveal~~delineate the major ~~aspects~~processes responsible for the  
154 increasing groundwater salinity ~~in the coastal aquifers, including lateral sub-surface sea-water intrusion,~~  
155 vertical leakage of marine-influenced surface water, induced mixing of saline geothermal water, and  
156 anthropogenic pollution. The goal is to ~~and to~~ obtain a more robust conceptual ~~model~~model for  
157 ~~deciphering of the~~ interconnections between groundwater the various water sources under the impact of  
158 groundwater exploitation. ~~flow system of the study area.~~ The results ~~will be helpful for the further~~  
159 ~~numerical simulations of coastal groundwater system. It is provide~~ very significant new information for to  
160 assist water resources management in the coastal plain of Bohai bay, and other similar coastal areas  
161 globally.

## 162 2. Study area

163 The Yang-Dai River coastal plain (Fig. 1) covers approximately 200km<sup>2</sup> ~~in of~~ the west side of  
164 Beidaihe District of Qinhuangdao City, ~~the~~ northeastern Hebei Province. It ~~connects the eastern section of is~~  
165 surrounded by the Yanshan ~~Mountain~~Mountains to the north and west, and ~~and surrounded by mountains.~~  
166 ~~The southern boundary of the study area is the~~ Bohai Sea. The plain ~~become low from~~declines in  
167 topographic elevation (with an average slope of 0.008) from approximately 390m above sea-level in the  
168 northwest to 1-25m in the southeast, forming and a fan-shaped distribution of ~~the incised~~ piedmont-~~coastal~~  
169 ~~inclined~~ alluvial plain sediments. Elevation ranges from 390 in the west and to 40-100 m in the north, and  
170 ~~25-40 in the east, and 25-1m in the south coastal region, with the average slope of 0.008.~~ Zaoyuan well  
171 field, located in the southern edge of the alluvial fan, approximately 4.3km from the Yang River estuary,  
172 was built in 1959 (Xu, 1986) as a major water supply for ~~this the~~ region. ~~It is 4.3 km from the southeastern~~  
173 ~~well field to Yang River estuary~~(Fig. 1).

### 174 2.1 Climate and hydrology

175 The study area is in a warm and semi-humid monsoon climate. On the basis of a 56-~~a~~year record in  
176 Qinhuangdao ~~area~~, the mean annual rainfall is ~~estimated to be~~approximately 640 mm, the average annual  
177 temperature ~~is about~~approximately 11°C, and mean potential evaporation ~~of~~ 1469 mm. 75% of the total  
178 annual rainfall falls in July-September (Zuo, 2006), during the East Asian Summer Monsoon. The average  
179 annual tide level is 0.86m (meters above Yellow Sea base level), while the highest and low tides ~~is~~are  
180 approximately 2.48m, and ~~the lowest is~~ 1.43m. —

181 The Yanghe River and Daihe River, originateding from the Yanshan Mountains, are the major surface

182 water bodies in this area, flowing southward into the Bohai Sea (Fig. 1). The Yang River is  
183 approximately 100 km long with a catchment area of 1029 km<sup>2</sup> and average annual runoff of 1.11×10<sup>8</sup> m<sup>3</sup>/a  
184 (Han, 1988). Dai River has a length of 35 km and catchment area of 290 km<sup>2</sup>, with annual runoff of  
185 0.27×10<sup>8</sup> m<sup>3</sup>/a. The rivers become soared full during when heavy intense rain events happened with short  
186 peak duration, whereas it and revert to became minimal flow or drying during the dry season – in part this is  
187 related to impoundment of flow in upstream reservoirs. The Yang River is about 100 km long with the  
188 catchment area of 1029 km<sup>2</sup>, and the average annual runoff of 1.11×10<sup>8</sup> m<sup>3</sup>/a (Han, 1988). Dai River has the  
189 length 35 km and catchment area of 290 km<sup>2</sup>, with annual runoff of 0.27×10<sup>8</sup> m<sup>3</sup>/a and average gradient of  
190 11.4%. The two rivers flow into the southern Bohai Sea.

## 191 2.2 Geological and hydrogeological setting

192 Groundwater in this the area mainly includes water in Quaternary porous sediment fissure as well as  
193 fractured bedrock water in the bedrock and water in the Quaternary porous media. The bedrock fissure  
194 water is distributed in the northern platform area. Its water abundance is Fractured rock groundwater  
195 volume mainly depend on the degree of weathering and the nature and regularity of fault zones (Fig. 1).  
196 The strata outcropping in the west, north and eastern edge of the plain includes the Archean gneiss,  
197 Proterozoic mixed granite and and Jurassic aged metamorphic and igneous rocks, which also underlie the  
198 The ex-Quaternary, which is exposed in the offshore area of the region, is mainly the Archean metamorphic  
199 granite, which is widely distributed. The mineral composition includes mainly quartz, feldspar, and biotite.  
200 The Quaternary sediments of the plain (from which most samples in this study were collected) are mostly  
201 underlain by the Archean gneisses and Proterozoic mixed granites. The basement faults under the  
202 Quaternary cover are mainly include the NE-trending fault and the NW-trending (Fig. 1) fault. The  
203 Quaternary aquifer system of the Yang-Dai River coastal plain is a complete groundwater system from the  
204 piedmont to the coast (see P-P' cross-section of Figure 2). these Geological techniques structures control the  
205 development and deformation thickness of the overlying sediments, as well as the distribution of hot  
206 springs and geothermal anomalies. Fault zones are also thought to be the main channel for deep water eyele  
207 and transport of thermal convection water from deeper to shallower depths.

208 The Quaternary sediments are widely distributed in the area, with the thickness ranging from  
209 approximately 5-80 m (mostly 20-40 m), up to more than 100 m immediately adjacent to the coastline. The  
210 bottom of the Holocene (Q<sub>4</sub>) unit in most areas has clay or consists of clay layers, which make making the

211 groundwater in the coastal zone ~~under~~ confined or semi-confined ~~status, although~~. There are no regional,  
212 continuous aquitards between several ~~layers of aquifer-forming sediments (Fig. 21bB)~~ aquifers. The  
213 ~~thickness of the Quaternary strata has a range of 5-80 m, mostly 20-40 m, and up to more than 100 m near~~  
214 ~~the coastline~~. The aquifer is mainly composed of medium sand, coarse sand and gravel ~~layers~~ with  
215 ~~thickness of 10-20 m and~~ water table depth of 1-4 m in the phreatic aquifer, and ~~deeper semi-confined~~  
216 ~~groundwater (where present and hydraulically separated from the phreatic aquifer) thickness of 10-30 m~~  
217 ~~and hosted in similar deposits with a water table depth-potentiometric surface of 1-5 m below topographic~~  
218 ~~elevation in the confined aquifer~~ (Zuo, 2006).

219 In the yearly peak season of agricultural water, the groundwater level decline sharply and reaches the  
220 lowest water table in April-May period, and become highest in January-February. The main sources of  
221 aquifer recharge are from rainfall infiltration, river water and irrigation return flow, lateral subsurface  
222 runoff from the piedmont area. Apart from the phreatic water evaporation, groundwater pumping is the  
223 main pathway of groundwater discharge for agricultural, industrial, tourism and sanatorium's utilization.  
224 The general flow direction of groundwater is from northwest to south, according to the topography. The  
225 main sources of recharge are from infiltration of rainfall, river water and irrigation return-flow, as well as  
226 lateral subsurface inflow from the piedmont area. Naturally, groundwater discharges into the rivers and the  
227 Bohai Sea. ~~Apart from phreatic water evaporation, groundwater pumping for agricultural, industrial and~~  
228 ~~domestic usage (including seasonal tourism) are currently the main pathways of groundwater discharge.~~

229 The ~~g~~Geothermal water ~~discharges into shallow Quaternary sediments~~ near the fault zones, ~~discharges~~  
230 ~~into shallow Quaternary sediments, which is the overlying strata in evident as~~ geothermal anomalous  
231 ~~area~~ anomalies (Hui, 2009). The temperature of thermal ~~water~~ ~~water~~ ranges is ~~from~~ 27-57<sup>o</sup>C in this  
232 low-to-medium temperature geothermal field (Zeng, 1991). ~~The thickness of the overlying strata is varied~~  
233 ~~from 24.6 to 58.8 m and consists of alluvial sand, gravel, clayey loam, clay and silt. The t~~Deeper thermal  
234 water is stored in the Archeozoic granite and metamorphic rocks, ~~which are composed of migmatite,~~  
235 ~~gneiss, and amphibole plagio-gneiss (Pan, 1990);~~ mMajor deep fracture zones are the good provide  
236 ~~pathways passage for the geothermal water movement (Yang, 2011). The heated groundwater in the deep~~  
237 ~~zones could upward transport along the fault and mix with~~ into the ~~overlying~~ cold groundwater in the  
238 Quaternary ~~aquifers~~ sediments (Pan, 1990; Shen et al., 1993; Yang, 2011).



### 2.3 Environmental issues Groundwater usage and seawater intrusion history

~~The s~~Shallow groundwater pumped from the Quaternary aquifer occupies 94% of ~~the~~ total groundwater exploitation, ~~and is which is~~ used for agricultural irrigation (~~accounts for~~ 52% of ~~the~~ total groundwater use), industrial ~~\_~~(32%) and domestic water (16%) (Meng, 2004). Many large and medium-sized reservoirs were built in the 1960s and 1970s ~~and resulted in meaning~~ that the surface water was intercepted and ~~the~~ downstream runoff dropped sharply, even ~~became causing rivers to dry up~~ in drought years. With the intensification of human socio-economic activities and growing urbanization, coupled with extended drought years (severe drought during 1976-1989 in north China) (Wilhite, 1993; Han et al., 2015), increased groundwater exploitation to meet the ever-growing fresh water demands ~~has~~ resulted in groundwater level ~~declining declines~~ and seawater intrusion (SWI) in the ~~coastal~~ aquifers.

The pumping rate in the Zaoyuan well field ~~was~~ gradually increased from 1.25 million m<sup>3</sup>/a in the early 1960s to 3.5 million m<sup>3</sup>/a in the late 1970s, and beyond 10 million m<sup>3</sup>/a in the 1980s. During 1966-1989, ~~the major agricultural planting in this region is of~~ paddy fields ~~became common, with big resulting in significant agricultural~~ water consumption. ~~This caused formation of a cone of depression in the Quaternary aquifer system. The g~~Groundwater pumping ~~time is in this region~~ mainly ~~occurs from May to October in spring and early summer, with typical pumping rates of of~~ 7~80,000 m<sup>3</sup>/d. ~~Pumping from the Zaoyuan well-field occurs in wells approximately 15 to 20m deep, which was over-exploited and resulted in formation of groundwater level declining depression. Groundwater levels decline sharply and reach their lowest level during May, before the summer rains begin, and recover to their yearly high in January-February (Fig. 2). In May 1986, the groundwater level in the depression center, which is located in Zaoyuan-Jiangying (Supplementary Figure S1), was decreased to below -2 \_m.a.s.l.-(meters above sea level), with and the depression area, which has with groundwater levels below the sea level, covered 28.2 km<sup>2</sup>. The local government commenced reduction in groundwater exploitation in this area after 1992, and groundwater levels began to decrease more slowly after 1995, even showing recovery in some wells. However, during an extreme drought year (1999), increased water demand resulted in renewed groundwater level declines in the region (Fig. 32). Since 2000, the groundwater levels have responded seasonally to water demand peaks and recharge (Fig. 2; Fig. S1).~~

~~Since From~~ 1990, the rapid development of township enterprises ~~in the 1980s~~ (mainly ~~refer to~~ paper mills), ~~also began to cause~~ groundwater over-exploitation in the western area ~~of the plain. (The groundwater i.e. the groundwater pumping rate for paper mills development~~ reached 55,000 m<sup>3</sup>/d in 2002.)

269 resultinged in ~~the~~ groundwater level depressions around Liushouying and Fangezhuang (Fig. 1). The lowest  
270 groundwater level in the western depression ~~center~~associated with this pumping in 1991 was up toreached  
271 -11.6 m.a.s.l. in 1991, and -17.4 m.a.s.l. in 2002. After the implementation of “Transferring Qing River  
272 water to Qinhuangdao” project ~~since in~~ 1992, the intensity of groundwater pumping generally ~~became~~  
273 slowed down~~reduced, and the~~. The depression center moved to Liushouying area. The groundwater level of  
274 ~~the in the~~ depression center ~~was~~ recovered to -4.3 m.a.s.l. in July 2006.

275 Overall, the depression area (groundwater levels below mean sea level) was recorded as 132.3km<sup>2</sup> in  
276 May 2004 and tThe shape of the depression ~~was~~has generally been elliptical with the major axis ~~of~~  
277 ~~the~~aligned E-W ~~direction~~. ~~The depression area developed to 132.3km<sup>2</sup> in May 2004.~~In addition to  
278 groundwater over-exploitation, climate change-induced recharge reduction has also likely contributed to  
279 groundwater level declines and hence seawater intrusion –(Fig. S2). The annual average rainfall declined  
280 from 639.7 mm between 1954 - 1979 to 594.2 mm between 1980-2010; a significant decrease over the last  
281 30 years (Zhang, 2012). As indicated in Figure S2, the severity of seawater intrusion (indicated by changes  
282 in Cl concentration, and the total area impacted by SWI, as defined by the 250mg/L Cl contour) correlates  
283 with periods of below average rainfall – indicated by monthly cumulative rainfall departure (CRD, Weber  
284 and Stewart, 2004).

285  
286 The gGroundwater quality of ~~the~~is area ~~has become~~ gradually became more salinized ~~since from~~  
287 early 1980s, with cChloride concentrations increasing year by year. As early as 1979, seawater intrusion  
288 ~~occurred~~ was recorded in the Zaoyuan well field. The intrusion area with groundwater chloride  
289 concentration greater than 250 mg/L ~~has been developed~~was to 21.8 km<sup>2</sup> in 1984, ~~and~~ 32.4 km<sup>2</sup> in 1991,  
290 52.6 km<sup>2</sup> in 2004 and, 57.3 km<sup>2</sup> in 2007 (Zuo, 2006; Zang et al., 2010). The chloride concentration of  
291 groundwater pumped from ~~the a monitored well-field well (depth of 18 m, this well field~~G10 in Fig. 1)  
292 changed from 90 mg/L in 1963 to; 218 mg/L in 1978, 567 mg/L in 1986, 459 mg/L in 1995, and 1367 mg/L  
293 in 2002 (Zuo, 2006), reducing to 812 mg/L in July 2007 ~~(this study)~~. The distance of estimated seawater  
294 intrusion into the inland area from the coastline had reached 6.5 km ~~inland~~ in 1991, and ~~developed to~~ 8.75  
295 km in 2008 (Zang et al., 2010). ~~At In~~ the early 1990s, 16 of 21 pumping wells in the well field ~~have~~  
296 ~~been~~were abundant abandoned due to the salinized water quality (Liang et al., 2010). Additionally, 370 of  
297 520 pumping wells were abandoned ~~has been abundant~~ in the wider Yang-Dai River coastal plain during  
298 1982-1991 (Zuo, 2006).

299

### 300 3. Methods

301 ~~Totally~~ In total, 80 water samples were collected from the Yang-Dai River coastal plain, including 58  
302 groundwater samples, 19 river water samples (from 12 sites); and 3 seawater samples, during three  
303 sampling campaigns, ~~namely~~, (June 2008, September 2009 and August 2010). Groundwater samples were  
304 pumped from 28 ~~productive-production~~ wells with ~~well~~-depths ~~of between~~ 6 and -110m, including 7 deep  
305 wells ~~with, which has well~~ depths greater more than 60m (Fig. 1). ~~While ideally, sampling for geochemical~~  
306 ~~parameters would be conducted on monitoring wells, due to an absence of these, production wells were~~  
307 ~~utilised. In most cases, the screened interval of these wells encompasses aquifer thicknesses of~~  
308 ~~approximately 5 to 15m above the depths indicated in Table 1.~~

309 ~~The water sampling sites can be shown in Figure 1.~~ In this study, ~~we sampling investigated focused~~  
310 ~~predominantly on low temperature~~ old groundwater; ~~from the productive wells.~~ ~~H~~however, ~~the~~  
311 geothermal water ~~existing from~~ around Danihe ~~cannot be ignored~~ was also considered a potentially  
312 important ongoing source of groundwater salinity. As such, while geothermal water samples were not  
313 accessible during our sampling campaigns (as the area is now protected). ~~The related data can be available~~  
314 ~~and referenced data reported by from~~ Zeng (1991) ~~due to that we cannot obtain the hot water samples from~~  
315 ~~the current geothermal field~~ were compiled and analyzed in conjunction with the sampled wells.

316 Measurements of ~~some physical~~ physico-chemical parameters (~~i.e.~~ pH, temperature, and electrical  
317 conductivity (EC)) were conducted in situ using a portable meter (WTW Multi 3500i). All water samples  
318 were filtered ~~to with~~ 0.45- $\mu$ m membrane filters before ~~collection for~~ analysis of hydrochemical composition.  
319 Two aliquots in polyethylene 100mL bottles at each site were collected; ~~for major cation and anion analysis,~~  
320 respectively. Samples for cation analysis ( $\text{Na}^+$ ,  $\text{K}^+$ ,  $\text{Mg}^{2+}$  and  $\text{Ca}^{2+}$ ) were ~~added~~ treated with 6-N  $\text{HNO}_3$  to  
321 prevent precipitation. Water samples were sealed and stored at 4- $^{\circ}$ C until ~~determination~~ analysis.  
322 ~~Bicarbonates w~~ as ~~ere~~ determined by titration within 12 ~~hours~~ hours after of sampling. ~~The c~~Concentrations  
323 of cations and some trace elements (~~i.e.~~ B, ~~and~~ Sr, Li) were analyzed by inductively coupled plasma-optical  
324 emission spectrometry (ICP-OES) ~~on filtered samples~~ in the chemical laboratory of the Institute of  
325 Geographic Sciences and Natural Resources Research (IGSNRR), Chinese Academy Sciences (CAS). Only  
326 the Sr data are reported here, as the other trace elements were not relevant to the interpretations discussed  
327 (Table 1). The detection limits for analysis of  $\text{Na}^+$ ,  $\text{K}^+$ ,  $\text{Mg}^{2+}$  and  $\text{Ca}^{2+}$  are 0.03, 0.05, 0.009, and 0.02 mg/L.

328 Concentrations of major anions (i.e.  $\text{Cl}^-$ ,  $\text{SO}_4^{2-}$ ,  $\text{NO}_3^-$  and  $\text{F}^-$ ) were analyzed ~~by using a~~ High Performance  
 329 Ion Chromatograph (SHIMADZU, LC-10ADvp) at the IGSNRR, CAS. ~~The detection limits for analysis of~~  
 330  ~~$\text{Cl}^-$ ,  $\text{SO}_4^{2-}$ ,  $\text{NO}_3^-$  and  $\text{F}^-$  are 0.007, 0.018, 0.016, and 0.006 mg/L. The testing precision the cation and anion~~  
 331 ~~analysis is 0.1-5.0%. The ion-Charge balance errors of the chemical results were~~ are less than 8%. ~~The~~  
 332 ~~hydrochemical and physical data are shown in Table 1. The s~~Stable isotopes ( $\delta^{18}\text{O}$  and  $\delta^2\text{H}$ ) of water  
 333 samples were measured ~~by using a~~ Finnigan MAT 253 mass spectrometer after on-line pyrolysis with a  
 334 Thermo Finnigan TC/EA in the Stable Isotopes Laboratory of the IGSNRR, CAS. The results ~~are expressed~~  
 335 ~~in ‰ relative to international standards (V-SMOW (Vienna Standard Mean Ocean Water)) and of resulting~~  
 336  $\delta^{18}\text{O}$  and  $\delta^2\text{H}$  values ~~are shown in Table 1. were expressed in ‰ relative to international standards~~  
 337 ~~(V-SMOW (Vienna Standard Mean Ocean Water)).~~ The analytical precision for  $\delta^2\text{H}$  is  $\pm 2\text{‰}$  and for  $\delta^{18}\text{O}$  is  
 338  $\pm 0.5\text{‰}$ . ~~All hydrochemical, physico-chemical and isotope data are reported in Table 1.~~

339 ~~Saturation indices for common minerals (i.e. calcite, dolomite, and gypsum) were calculated using~~  
 340 ~~PHREEQC version 2.8 (Parkhurst and Appelo, 1999) to understand the saturation status of these minerals~~  
 341 ~~in the aquifer. Ionic delta values were calculated to further investigate the hydrogeochemical behavior that~~  
 342 ~~take place in the aquifer and modify groundwater hydrochemistry. The ionic delta values express~~  
 343 ~~enrichment or depletion of each ion's concentration relative to its theoretical concentration~~ ~~Mixing~~  
 344 ~~calculations were also conducted on the basis of~~ ~~calculated from the~~  $\text{Cl}^-$  concentrations of the samples  
 345 ~~under for~~ a conservative freshwater-seawater mixing system (Fidelibus et al., 1993; Appelo, 1994). ~~The~~  
 346 ~~delta values have been used as effective indicators of coastal groundwater undergoing freshening or~~  
 347 ~~salinizing processes, accompanied by related water-rock interaction (prevailingly cation exchange).  $\text{Cl}^-$  can~~  
 348 ~~be regarded as a conservative tracer for the calculations mentioned below.~~ The seawater contribution for  
 349 each sample ~~can be~~ expressed ~~by as~~ a fraction of seawater ( $f_{sw}$ ), ~~which can be calculated~~ using (Appelo  
 350 and Postma, 2005):

$$351 \quad f_{sw} = \frac{C_{Cl,sam} - C_{Cl,f}}{C_{Cl,sw} - C_{Cl,f}} \quad (1)$$

352 where  $C_{Cl,sam}$ ,  $C_{Cl,f}$ , and  $C_{Cl,sw}$  refer to the  $\text{Cl}^-$  concentration in the sample, freshwater, and seawater,  
 353 respectively. ~~Based on the  $f_{sw}$  value, the theoretical concentration ( $C_{i,mix}$ ) of each ion in a water sample can~~  
 354 ~~be calculated by:~~

$$355 \quad C_{i,mix} = f_{sw} \cdot C_{i,sw} + (1 - f_{sw}) \cdot C_{i,f} \quad (2)$$

356  $C_{i,sw}$  and  $C_{i,f}$  refer to the measured concentration of the ion  $i$  in the seawater and freshwater,  
357 respectively. The ionic delta value ( $\Delta C_i$ ) of ion  $i$  can be obtained by:

$$\Delta C_i = C_{i,sam} - C_{i,mix} \quad (3)$$

358  $C_{i,sam}$ —the measured concentration of the ion  $i$  in the water sample.

## 361 4. Results

### 362 4.1 Groundwater dynamics

363 Due to the different groundwater pumping rate and patterns, the variation trend of groundwater level  
364 has been different in the east and west areas of the Yang Dai River coastal plain. In the east part, owing to  
365 the intensive exploitation in the Zaoyuan well field, the groundwater level was gradually declined to be  
366 lower than the sea level during the 1980s. The center of groundwater level depression was located in  
367 Zaoyuan-Jiangying region, with the groundwater level lower than -3 m.a.s.l. The local government  
368 commenced to reduce the exploitation after 1992. The groundwater level decreased slowly after 1995, even  
369 started to recovery in some wells as a result of pumping reduction. During the extreme drought year (1999),  
370 the consequential increased water demand made the groundwater level declined again in the east region. In  
371 the late 1980s, the groundwater level at the west region was still more than 0 m.a.s.l. But in the late 1990s,  
372 due to the fast development of the local paper mills as the big water consumers, the groundwater level  
373 dropped year by year and had big falling amplitude after 2000, resulting in the overall transfer of  
374 groundwater depression center to the western region (Liushouying-Fangezhuang). The groundwater level in  
375 this center was up to -14 m.a.s.l. in May 2002.

376 Based on the data from the three monitoring wells, the seasonal variation of groundwater level in this  
377 area can be seen from Figure 3. After 2000, the groundwater level in the east of the Yang Dai River coastal  
378 plain was mainly affected by the groundwater pumping for agricultural and domestic water use. During  
379 March and June of each year, the shallow groundwater pumping as the major water source for irrigation has  
380 resulted in the fast dropped water level occurred between April and June, down to the lowest level of water  
381 throughout the year. As the rainy season started in July, groundwater pumping began to decrease.  
382 Groundwater level rise rapidly with the infiltration of irrigation return flow and rainfall, lateral subsurface  
383 runoff from the surrounding aquifers. After the end of the rainy season (July to September), the water level  
384 continues to rise gently and reach the annual maximum water level during January and February. With the

385 amount of recharge is reduced along with the increase of domestic water pumping, water level circularly  
386 slow down to the next agricultural peak. In addition to groundwater over-exploitation, climate  
387 change induced recharge reduction in recent three decades has been also part of the cause of groundwater  
388 level declining, resulting in the seawater intrusion. The annual average rainfall varied from 639.7 mm  
389 (1954–1979) to 594.2 mm (1980–2010). It obviously finds that there is a significant decrease in rainfall  
390 over the last 30 years (Zhang, 2012). In general, the groundwater runoff intensity gradually decreases from  
391 the piedmont to the coastal region.

#### 392 4.2.1 Water stable isotopes ( $\delta^2\text{H}$ and $\delta^{18}\text{O}$ )

393 The local meteoric water line (LMWL,  $\delta^2\text{H}=6.6 \delta^{18}\text{O}+0.3$ ,  $n=64$ ,  $r^2=0.88$ ) is based on  $\delta^2\text{H}$  and  $\delta^{18}\text{O}$   
394 mean monthly rainfall values between 1985 and 2003 from Tianjin station some 120 km SW of  
395 Qinhuangdao City (IAEA/WMO, 2006). Due to similar climate and position relative to the coast, this can  
396 be regarded as representative of the study area. 19 wSurface water samples collected from Yang River and  
397 Dai River ( $n = 19$ ) have  $\delta^{18}\text{O}$  and  $\delta^2\text{H}$  values ranging from -10.1 to -0.6‰ (mean= -5.4‰) and ~~from~~-71  
398 ~~to~~-11‰ (mean = -43‰), respectively. ~~It seems that the s~~Stable isotopes compositions ~~for surface water~~  
399 ~~appear to exhibit~~have significant seasonal variation (Fig. S3); ~~f~~For Yang River, ~~3 surface water~~ samples  
400 ~~from~~ in the relatively dry season (June 2008,  $n = 3$ ) ~~were characterized by~~had mean  $\delta^{18}\text{O}$  and  $\delta^2\text{H}$  values  
401 ~~ranging from~~ -5.5 to -1.1‰ (mean=~~of~~ -3.0‰) and ~~from~~ -49 to -15‰ (mean=~~of~~ -31‰), respectively; ~~Whereas~~  
402 ~~6 water samples s~~sampled in ~~from the~~ wet season (August 2009 and September 2010,  $n = 6$ ) had ~~mean~~ve  
403  $\delta^{18}\text{O}$  and  $\delta^2\text{H}$  values ~~ranging from~~ -10.1 to -2.4‰ (mean=~~of~~ -6.6‰) and ~~from~~ -71 to -21‰ (mean=~~of~~  
404 -48‰), ~~‰~~, respectively. ~~As to~~ Dai River, ~~s~~ samples showed similar results; the dry season mean in ~~dry~~  
405 ~~season, 3 surface water samples are characterized by~~  $\delta^{18}\text{O}$  and  $\delta^2\text{H}$  values ( $n = 3$ ) ranging from -3.9 to  
406 -0.6‰ (mean=~~were~~ -2.6‰) and ~~from~~ -44 to -11‰ (mean=~~of~~ -32‰), respectively; and in wet season samples  
407 ( $n = 7$ ), ~~7 surface water samples have had mean~~  $\delta^{18}\text{O}$  and  $\delta^2\text{H}$  values ranging from -9.7 to -1.2‰ (mean=~~of~~  
408 -6.6‰) and ~~from~~ -69 to -12‰ (mean=~~of~~ -49‰), respectively (Fig. 43).

409 The water samples collected from Yang River and Dai River have similar stable isotopes composition.

410 The 56 groundwater samples ~~are~~ were characterized by  $\delta^{18}\text{O}$  and  $\delta^2\text{H}$  values ranging from -11.0 to  
411 -4.2‰ (mean= -6.5‰) and ~~from~~-76 to -39‰ (mean = -50‰), respectively. Among ~~them~~these, shallow  
412 and deep groundwater samples showed similar mean values, although deep groundwater samples ( $n = 13$ )  
413 showed relatively narrow overall ranges (43 shallow groundwater samples have  $\delta^{18}\text{O}$  and  $\delta^2\text{H}$  values

414 ranging from -11.0 to -4.2‰ (mean = -6.6‰) and from -76 ~ -39‰ (mean = -50‰), respectively; 13 deep  
415 groundwaters have  $\delta^{18}\text{O}$  and  $\delta^2\text{H}$  values ranging from -7.8 to -5.1‰ and (mean = -6.3‰) for  $\delta^{18}\text{O}$ ; and  
416 from -58 to -43‰ and (mean = -50‰ for  $\delta^2\text{H}$ ; Fig. 43), respectively). Slight seasonal variation was  
417 evident in the groundwater isotope compositions: For the shallow groundwater from, during the dry season  
418 (n = 12) water samples have showed  $\delta^{18}\text{O}$  and  $\delta^2\text{H}$  values ranging from -7.2 to -4.2‰ (mean = -5.7‰) and  
419  $\delta^2\text{H}$  values from -56 to -39‰ (mean = -48‰), respectively; while during the wet season (n = 31)  
420 water samples are featured by  $\delta^{18}\text{O}$  and  $\delta^2\text{H}$  values ranged with a range of from -11.0 ~ -5.3‰ (mean =  
421 -6.9‰) and -76 ~ -43‰ (mean = -51‰), respectively. Some variability was also evident in deep  
422 groundwater compositions, although only three deep samples were collected during the dry season. For the  
423 deep groundwater, during the dry season, 3 water samples have  $\delta^{18}\text{O}$  and  $\delta^2\text{H}$  values ranging from -5.3 to  
424 -5.1‰ (mean = -5.2‰) and from -47 ~ -45‰ (mean = -46‰), respectively; during the wet season, 10 water  
425 samples are featured by  $\delta^{18}\text{O}$  and  $\delta^2\text{H}$  values with a range of -7.8 ~ -5.2‰ (mean = -6.6‰) and -58 ~ -43‰  
426 (mean = -51‰), respectively.

427 The local meteoric water line (LMWL,  $\delta^2\text{H} = 6.6 \delta^{18}\text{O} + 0.3$ , n = 64,  $r^2 = 0.88$ ) is based on  $\delta^2\text{H}$  and  $\delta^{18}\text{O}$   
428 mean values of the monthly rainfall between 1985 and 2003 at Tianjin station some 120 km SW of  
429 Qinhuangdao City. The data were obtained from International Atomic Energy Agency/World  
430 Meteorological Organization (IAEA/WMO, 2006). Due to the similar climatic and coastal conditions  
431 between Tianjin and Qinhuangdao, this meteoric water line can be regarded as the local meteoric water line  
432 (LMWL) in this study. From Figure 43, it can be seen that surface water have exhibits a much more wider  
433 range of  $\delta^{18}\text{O}$  and  $\delta^2\text{H}$  values relative to groundwater, with shallow groundwater in turn more spatially  
434 variable than deep groundwater. Water samples collected in the wet season have showed more wider ranges  
435 of  $\delta^{18}\text{O}$  and  $\delta^2\text{H}$  values relative to water sampled in the dry season. Most of water samples of all  
436 types plot to the right of (below) the LMWL, with some surface water samples showing similar  
437 compositions to the local seawater (Fig. 43). The local seawater plots below (more negative) than  
438 typically assumed values (e.g. VSMOW = 0‰) for both  $\delta^2\text{H}$  and  $\delta^{18}\text{O}$ , and this water appears to represents  
439 an end-member involved in mixing with meteoric-derived waters in both ground and surface water (Fig.  
440 43) enriched in isotopes and plots far below the LMWL.

#### 441 4.3.2 Water salinity and major dissolved ions

442 TDS (total dissolved solids) concentrations of the surface water samples from Dai River have a range

443 ~~from~~ 0.3g/L~31.4g/L with ~~22-78%~~  $\text{Na}^+$  and  ~~$\text{Ca}^{2+}$  comprising 22-78% and 4-56-4%~~  $\text{Ca}^{2+}$  of total cations  
444 and ~~36-91%~~  $\text{Cl}^-$  comprising 36-91% of total anions. ~~The composition changes from~~  $\text{Ca}\cdot\text{Na}\cdot\text{Mg}\cdot\text{Cl}\cdot\text{HCO}_3$   
445 to Na-Cl water type from ~~the~~ upstream ~~to~~ ~~the~~ downstream locations ~~along with increasing salinity~~;  $\text{Cl}^-$   
446 concentrations vary from approximately 70 mg/L upstream to 16700 mg/L near the coastline, due to marine  
447 influence. ~~The  $\text{Cl}^-$  concentrations varied from about 70 mg/L in the upstream to 16700 mg/L near the~~  
448 ~~coastline. Similar variation occurs along the For Yang River, the collected water where~~ samples have TDS  
449 concentrations ~~of between~~ 0.3-26.1 g/L with ~~increasing percentages concentrations and proportions~~  
450 ~~(33-91%)~~ of  $\text{Cl}^-$  concentrations (63.2-14953.5 mg/L) from ~~the up-reach stream to the down-reach stream~~  
451 locations, ~~with water types changed from  $\text{Ca}\cdot\text{Na}\cdot\text{HCO}_3\cdot\text{Cl}\cdot\text{SO}_4$ ,  $\text{Ca}\cdot\text{Mg}\cdot\text{Cl}\cdot\text{SO}_4\cdot\text{HCO}_3$  to Na-Cl. The~~  
452 ~~Nitrate contents concentrations also~~ range from 2.8 to 65.2 mg/L in the surface water samples, ~~increasing~~  
453 ~~downstream.~~

454 Groundwater hydrochemistry can be ~~modified the comprehensive effects from geological, climatic,~~  
455 ~~hydrogeological processes and anthropogenic activities.~~ In the early 1960s, groundwater pumped from the  
456 Zaoyuan well field ~~was featured by the exhibited~~  $\text{Ca}\cdot\text{HCO}_3$  water type and chloride concentrations of  
457 90-130 mg/L; ~~this was followed by rapid salinization since the 1980s (see section 2.3). In the early 1970s,~~  
458 ~~individual wells appear slightly salinized. It has been deteriorated rapidly since the early 1980s. The~~  
459 ~~chloride concentration of groundwater from water supply wells was 90mg/L in 1963, 218 mg/L in 1975,~~  
460 ~~385 mg/L in 1984, 456.3 mg/L in 1986, 459.5 mg/L in 1995, 928.3 mg/L in 2000, 1367 mg/L in 2002, and~~  
461 ~~1290.4 mg/L in 2005 (Zang et al., 2010).~~ In this study, ~~the~~ shallow groundwater is characterized by TDS  
462 concentrations of 0.4-4.8 g/L with ~~the percentage of~~  $\text{Cl}^-$  (34-77%),  $\text{Na}^+$  (12-85%) and  $\text{Ca}^{2+}$  (5-69%) ~~being~~  
463 ~~the predominant major anion and cations, respectively. and water~~ Groundwater hydrochemical types ~~varied~~  
464 ~~vary~~ from  $\text{Ca}\cdot\text{HCO}_3\cdot\text{Cl}$ ,  $\text{Ca}\cdot\text{Na}\cdot\text{Cl}$ ,  $\text{Na}\cdot\text{Ca}\cdot\text{Cl}$  to Na-Cl, ~~which can be seen from Piper plot (Figure 54).~~  
465 ~~The d~~ Deep groundwater ~~is featured by~~ has TDS concentrations ~~of between~~ 0.3-2.8g/L, ~~which is~~ dominated  
466 by Ca (up to 77% ~~of major cations~~) in the upstream area and Na (up to 85% ~~or major cations~~) near ~~the~~ coast,  
467 with water type ~~distributed in series of evolving from~~  $\text{Ca}\cdot\text{Cl}\cdot\text{HCO}_3$  ~~to~~;  $\text{Ca}\cdot\text{Na}\cdot\text{Cl}$  and  $\text{Na}\cdot\text{Mg}\cdot\text{Cl}$  (Figure 54).  
468 ~~At present, t~~ The TDS of groundwater from the well field reaches 3.31 g/L with Na-Cl water type ~~in the (see~~  
469 ~~well G15). The relative high fracture~~ The highest observed ~~mixing proportions~~ of seawater occurs in ~~the~~  
470 shallow well G10 and deep well G2, ~~respectively,~~ with ~~calculated~~  $f_{sw}$  values ~~(according to equation 1)~~ of  
471 12.95% and 5.35%, respectively.

472 Hydrochemical features of thermal water from the Danihe-Luwangzhuang area (Fig. 1A) are distinct



473 from the normal/low temperature groundwater. Previous work by Zeng (1991) and Hui (2009) identified  
474 geothermal water with high TDS in the fractures of deep metamorphic rock. The geothermal water was  
475 characterized by TDS values between 6.2-10.6 g/L and Ca•Na-Cl water type, while Cl<sup>-</sup> concentrations  
476 ranged from 5.4 to 6.5 g/L and Sr concentrations from 6.73 to 89.8 mg/L. Some normal/low temperature  
477 groundwater samples collected in this study from wells G8, G19, and G9 featured by Ca•Na-Cl water type  
478 with relative high TDS ranges (0.8-1.4 g/L, 1.3-1.6 g/L, and 1.5-2.8 g/L, respectively) and strontium  
479 concentrations (1.1-1.9 mg/L, 4.9-7.1 mg/L, and 7.3-11.6 mg/L, respectively), showing similarity with the  
480 geothermal system. Low temperature groundwater sampled in this study had Sr/Cl mass ratios ranging from  
481  $2.4 \times 10^{-4}$  to  $1.6 \times 10^{-2}$ , with higher ratios in deep groundwater (range:  $9.4 \times 10^{-4}$  to  $1.3 \times 10^{-2}$ ,  
482 median:  $3.7 \times 10^{-3}$ ) compared to shallow groundwater (median:  $3.1 \times 10^{-3}$ ), and groundwater generally  
483 higher than seawater/saline surface water (range:  $3.7 \times 10^{-4}$  to  $5.8 \times 10^{-4}$ , median:  $3.9 \times 10^{-4}$ ; Table S1).

484 ~~The nitrate~~ Nitrate contents concentrations in groundwater have a range of from 2.0-178.5 mg/L (mean  
485 90.1 mg/L) for shallow groundwater, and 2.0-952.1 mg/L (mean 232.1 mg/L) for the deep groundwater,  
486 respectively, with most of which samples seriously exceedings the WHO drinking water standard (50  
487 mg/L).

488 ~~There is a geothermal field around Danihe-Luwangzhuang area (Fig. 1). Hydrochemical features of~~  
489 ~~thermal water are very distinct from cold water. The previous investigation has identified the buried~~  
490 ~~geothermal water with high TDS in the fracture/fissure of deep metamorphic rock (Zeng, 1991). Due to the~~  
491 ~~pumping wells for pumping thermal water were protected and not permitted to be sampled, we have to~~  
492 ~~collect some data associated this geothermal field from the previous research. The geothermal field is~~  
493 ~~controlled by the fault distribution under confined state. The thermal water flows along the fault zone and~~  
494 ~~enters the Quaternary aquifer, forming hot salt water distributed around the spill point and expanded~~  
495 ~~towards downstream. It can result in the similar hydrochemical characteristics between Quaternary salt~~  
496 ~~groundwater and deep original thermal waters from bedrocks. The geothermal water is characterized by~~  
497 ~~Ca•Na-Cl water type, 6.2-10.6 g/L of TDS and 7.4-8.7 of pH values. Cl<sup>-</sup> concentrations range from 5.4 to~~  
498 ~~6.5 g/L, Na<sup>+</sup> from 1.7 to 2.0 g/L, Ca<sup>2+</sup> from 1.6 to 1.9 g/L, F<sup>-</sup> from 3.0 to 3.6 mg/L, Sr from 6.73 to 89.8~~  
499 ~~mg/L, Li from 0.43 to 1.58 mg/L, and SiO<sub>2</sub> from 44.0 to 48.3 mg/L (Hui, 2009). The groundwater samples,~~  
500 ~~collected from the wells G8, G19, and G9 with different depths, are featured by Ca•Na-Cl water type with~~  
501 ~~relative high TDS ranges (0.8-1.4 g/L, 1.3-1.6 g/L, and 1.5-2.8 g/L, respectively) and Sr contents (1.1-1.9~~  
502 ~~mg/L, 4.9-7.1 mg/L, and 7.3-11.6 mg/L, respectively).~~

## 5. Discussions

### 5.1 Groundwater ~~flow system~~ isotopes and ~~hydrochemical features~~ hydrochemistry as indicators of mixing processes

~~Generally, The~~ Quaternary groundwater system in the Yang-Dai River coastal plain ~~is~~ may be recharged by precipitation, irrigation return flow, river infiltration and lateral subsurface runoff (e.g. from mountain-front regions). ~~Due to the natural geological function and human pumping activities, there have been interactions between groundwater and geothermal waters around Danihe area or between groundwater and seawater in the coastal area. The~~ Groundwater geochemical ~~features characteristics~~ are then controlled by ~~the complex~~ hydrogeological conditions and ~~these hydrological~~ mixing processes, including mixing induced by extensive groundwater pumping, as well as natural mixing and water-rock interaction. It is evident from the geochemistry that mixing has occurred between groundwater and seawater in the coastal areas, as well as between normal/low temperature groundwater and geothermal water in the inland areas (e.g. near the Danihe geothermal field). ~~The~~ Different sources of water ~~bodies~~ are generally characterized by ~~somewhat distinctive~~ different ~~of~~ stable isotopic and hydrochemical compositions, allowing mixing calculations to aid understanding of ~~determining~~ the groundwater salinization and mixing processes, as discussed below in this area.

~~The~~ Stable isotopes of O and H ~~in groundwater and surface water~~ can be used to describe the ~~groundwater origin and to identify the mixing processes between different water bodies. The~~ fall on a best-fit regression line ~~slope of the best fit regression line for collected groundwater samples~~ (dashed line in Fig. 43) ~~given as with slope of~~  $\delta^2\text{H}=4.4\times\delta^{18}\text{O}-21.7$ , which is significantly lower than either the local or global meteoric water lines. ~~Three processes are likely responsible for the observed range of isotopic compositions: 1. Mixing between saline surface water (e.g. seawater or saline river water affected by tidal ingress) and fresher, meteoric-derived groundwater or surface water; 2. Mixing between fresh meteoric-derived groundwater and saline thermal water; 3. Evaporative enrichment of surface water and/or irrigation return-flow, which may~~ The deviation of groundwater and surface water lines from the LMWL ~~has evidenced evaporative processes occurred during water infiltration groundwater in some areas and surface runoff. A sub-group of surface water samples (e.g., S1 to S3, S7 and S12; termed 'brackish surface water')~~ show marine-like stable isotopic compositions and major ion compositions (Fig. 43 and Fig. 5). The 'fresh' surface water samples (e.g. EC values <1500  $\mu\text{S}/\text{cm}$ ) exhibit meteoric-like stable isotope compositions, with some samples (such as S9 and S10) showing clear evidence of evaporative enrichment

533 in the form of higher  $\delta^2\text{H}$  and particularly,  $\delta^{18}\text{O}$  values (Fig. 43).

534 Fresh groundwater has depleted  $\delta^{18}\text{O}$  and  $\delta^2\text{H}$  values relative to seawater and show a clear meteoric  
535 origin, albeit with modification due to mixing. Theoretically, the mixing of meteoric-derived fresh  
536 groundwater and marine water should result in a straight mixing line connecting the two end members;  
537 however this is also complicated in the study area by the possible mixing with geothermal water. The  
538 thermal groundwater has distinctive stable isotopic and major ion composition (Han, 1988; Zeng, 1991),  
539 allowing these mixing processes to be partly delineated. Stable isotopes of thermal groundwater are more  
540 depleted than low-temperature groundwater (e.g.  $\delta^{18}\text{O}$  values of approximately -8‰, Fig. 8), indicating this  
541 likely originates in the mountainous areas to the north; Zeng (1991) estimated the elevation of the recharge  
542 area for the geothermal field to be from 1200 to 1500 m.a.s.l. Based on a bivariate plot of  $\delta^{18}\text{O}$  vs.  $\text{Cl}^-$  with  
543 mixing lines and defined fresh and saline end-members, Fig. 65 shows the estimated degree of mixing  
544 between fresh groundwater including shallow (G4) and deep (G25) groundwater end-members, and saline  
545 water, including seawater and geothermal end-members.

546 The two fresh end-members were selected to represent a range of different groundwater  
547 compositions/recharge sources, from shallow water that is impacted by infiltration of partially evaporated  
548 recharge (fresh but with enriched  $\delta^{18}\text{O}$ ) to deeper groundwater unaffected by such enrichment (fresh and  
549 with relatively depleted  $\delta^{18}\text{O}$ ). The narrower range and relatively enriched stable isotopes in shallow  
550 groundwater samples collected during the dry season compared with the wet season indicate some  
551 influence of seasonal recharge by either rainfall (fresh, with relatively depleted stable isotopes) or irrigation  
552 water subject to evaporative enrichment (more saline, with enriched stable isotopes and high nitrate  
553 concentrations; Currell et al., 2010) and/or surface water leakage. While there is overlap in the isotopic and  
554 hydrochemical compositions of shallow and deep groundwater (Fig. 3 & Fig. 4), this effect appears to only  
555 affect the shallow aquifer.<sup>34</sup>

556 Based on Fig. 5, the shallow groundwater samples (e.g. G15, G10, G11, G14) collected from or  
557 around the Zaoyuan well field appear to be characterized by mixing between fresh meteoric water and  
558 seawater (plotting in the upper part of Fig. 65); while some deeper groundwater samples (e.g. G13, G2,  
559 G16, G14) collected from the coastal zone also appearing to indicate mixing with seawater. Groundwater  
560 sampled relatively close to the geothermal field (e.g. G9, G19) shows compositions consistent with mixing  
561 between low-temperature fresh water and saline thermal water (lower part of Fig. 5). This is more evident  
562 in deep groundwater than shallow groundwater, which is consistent with mixing from below, as expected

563 for the deep-source geothermal water. Other samples impacted by salinization show more ambiguous  
564 compositions between the various mixing lines, which may arise due to mixing with either seawater,  
565 geothermal water or a combination of both (e.g., G29).

566 The estimated mixing fraction ( $f_{sw}$ ) of marine water for the shallow brackish groundwater ranges from  
567 1.2~13.0% and 2.6~6.0% for the deep brackish groundwater. The highest fraction of 13% was recorded in  
568 G10, located in the northern part of the Zaoyuan well field, which is located near a tidally-impacted  
569 tributary of the Yang River (Fig 1). Relatively higher fractions of marine water in relatively shallow  
570 samples (including those from the well field) compared to deeper samples may indicate a more ‘top down’  
571 salinization process, related to leakage of saline surface water through the riverbed, rather than ‘classic’  
572 lateral sea water intrusion, which typically causes salinization at deeper levels due to migration of a salt  
573 water ‘wedge’ (e.g. Werner et al., 2013); this is consistent with results of resistivity surveys conducted in  
574 the region (Fig. 6). –The profile of chloride concentrations vs. depth indicates that salinization affects  
575 shallow and deep samples alike, with the most saline samples being relatively shallow wells in the  
576 Zaoyuan well-field (Fig. 77). The composition of stable isotopes in groundwater samples collected in the  
577 relatively dry season has been narrower and enricher than that collected in the wet season. It could be  
578 resulted from evaporation processes during the infiltration of local irrigation return flows in the dry season.

579 The composition of stable isotopes for thermal groundwater could be originated from precipitation,  
580 however, its  $^{14}\text{C}$  age dating between 3.4–12.8ka with tritium content of less than 2 TU (Zeng, 1991),  
581 indicating thermal waters might be formed under cooler climate condition than present climate. The  
582 composition of stable isotopes of thermal groundwater are more depleted than that of cold groundwater,  
583 even lower than the cold groundwater from mountain-front area, indicating the thermal groundwater could  
584 be mainly originated from NW mountain area, where has higher elevation. The elevation range of recharge  
585 area for Danihe geothermal field is from 1200 to 1500 m.a.s.l obtained by Zeng (1991).

586 In general, brackish and fresh groundwater samples show distinctive major ion compositions, with the  
587 more saline water typically showing higher proportions of Na and Cl (Fig. 54). This contrasts with historic  
588 data collected from the Zaoyuan well field, which showed Ca-HCO<sub>3</sub> type water with Cl concentrations  
589 ranging from 130 to 170 mg/L. This provides additional evidence that the salinization in this area is largely  
590 due to marine water mixing. More Ca-dominated compositions are evident in the region near the  
591 geothermal well field further in-land (e.g., G5, G8, G19, G29, and G24); consistent with a component of  
592 salinization that is unrelated to marine water intrusion. Plots of ionic ratios of Na/Cl and Mg/Ca vs. Cl also

593 reveal a sub-set of relatively saline deep groundwater samples which appear to evolve towards the  
594 geothermal-type signatures with increasing salinity (Fig. 88).

595 Stronger evidence of mixing of the geothermal water in the Quaternary aquifers (particularly deep  
596 groundwater) is provided by examining strontium concentrations in conjunction with chloride (Fig. 99).  
597 The geothermal water from Danihe geothermal field has much higher Sr concentrations (up to 89.8 mg/L)  
598 than seawater (5.4-6.5 mg/L in this study), due to Sr-bearing minerals (i.e., celestite, strontianite) with Sr  
599 contents of 300-2000 mg/kg present in the bedrock (Hebei Geology Survey, 1987). Groundwater sampled  
600 from near the geothermal field in this study has the highest Sr concentrations e.g., G9 with Sr  
601 concentrations ranging from 7.4 to 11.6 mg/L, and G19 from 4.9 to 7.1 mg/L.

602 The plot of chloride versus strontium concentrations (Fig. 99) shows that these samples and others  
603 (e.g., G16, G20, G27, G29) plot close to a mixing line between fresh low-temperature and saline  
604 thermal-groundwater. Mass ratios of Sr/Cl in these samples are also elevated relative to seawater by an  
605 order of magnitude or more (e.g. Sr/Cl >5.0  $\times 10^{-3}$ , compared to 3.9  $\times 10^{-4}$  in seawater, Table S1). Other  
606 samples from closer to the coast (e.g. G4) also approach the thermal-low temperature mixing line,  
607 indicating probable input of thermal water. Samples collected from the Zaoyuan well field generally plot  
608 closer to the Sr/Cl seawater mixing line (consistent with salinization largely due to marine water – Fig. 89);  
609 however, samples mostly plot slightly above the mixing line with additional Sr, which may indicate more  
610 widespread (but volumetrically minor) mixing with the thermal water in addition to seawater.

## 611 5.2 Anthropogenic pollution of groundwater

612 The occurrence of high nitrate (and possibly also sulfate) concentrations in groundwater in both  
613 coastal and in-land areas also indicates that anthropogenic pollution is an important process impacting  
614 groundwater quality and salinity (Fig. 1010; Table 1). Fresh groundwater has depleted  $\delta^{18}\text{O}$  and  $\delta^2\text{H}$  values  
615 relative to seawater. Theoretically, the mixing of fresh groundwater and seawater should show a straight  
616 line connecting the two end members. Obviously, some surface water samples (e.g. S1, S2, S3, S7, S12) are  
617 the mixture with seawater. In this study area, there are three end members (namely, fresh groundwater,  
618 thermal groundwater and seawater), which has been evidenced by the previous studies (Han, 1988; Zeng,  
619 1991). Thus, the diagram of  $\delta^{18}\text{O}$  vs. Cl<sup>-</sup> (Fig. 6) can be used to identify the mixing pattern among three end  
620 members. Fig. 6 shows the mixing lines between shallow fresh groundwater (G4) and seawater, between  
621 deep fresh groundwater (G25) and seawater, between shallow fresh groundwater and thermal water, and

622 between deep fresh groundwater and thermal water. The shallow groundwater samples (e.g. G15, G10, G11,  
623 G14) collected from or around the Zaoyuan well field are characterized by mixing with seawater. The deep  
624 groundwater samples (e.g. G13, G2, G16, G14') collected from the coastal zone are also resulted from  
625 mixing with seawater. The sampling site of deep groundwater sample G29 is located between thermal field  
626 and the coastline and obviously affected by both of mixing processes. The groundwaters (e.g. G9, G19),  
627 sampled from the area affected by geothermal field are mixture between fresh cold groundwater with  
628 thermal waters. The mixing fraction ( $f_{sw}$ ) of seawater has a range of 1.2–13.0% for the shallow brackish  
629 groundwater, and 2.6–6.0% for the deep brackish groundwater.  $f_{sw}$  reaches the highest percentage of 13% in  
630 the well G10, which is located in the north part of the well field.

631 At the late 1950s, groundwater pumped from the Zaoyuan well field was characterized by  $\text{Ca-HCO}_3$   
632 type water with Cl concentrations ranging from 130 to 170 mg/L. The hydrochemical data investigated in  
633 1986 (Han, 1986) showed that there were mainly five water types in this study area, including  $\text{Ca-HCO}_3$   
634 type with TDS less than 0.5g/L distributed in the mountain front area,  $\text{Ca}\cdot\text{Na-Cl}\cdot\text{SO}_4$ ,  $\text{Ca}\cdot\text{Na}\cdot\text{Mg-SO}_4\cdot\text{Cl}$ ,  
635 or  $\text{Na}\cdot\text{Ca-Cl}\cdot\text{SO}_4$  type water with TDS 0.4–0.7g/L distributed around the Zaoyuan well field and  
636 Wanggezhuang,  $\text{Ca}\cdot\text{Na-Cl}$  type water with TDS 0.4–1.8g/L distributed around the geothermal field  
637 (Luwangzhuang) and Duzhai,  $\text{Na-HCO}_3$  or  $\text{Na-HCO}_3\cdot\text{Cl}$  type water with TDS 0.5–0.9g/L distributed the  
638 SW area close to the coastal zone, and  $\text{Cl-Na}$  type water with TDS 0.4–2.4g/L distributed in the coastal  
639 zone. Due to the disturbance of human activities, the current groundwater hydrochemistry has become more  
640 complex than that before. Compared salty water distributed 2 km away from coastline in the late 1950s, the  
641 distance has increased to about 7 km away from coastline. The  $\text{Cl-Ca}\cdot\text{Na}$  or  $\text{Cl-Ca}$  type water type mainly  
642 distributed in the area affected by geothermal field, such as G5, G8, G19, G29, and G24, indicating the  
643 salinizing process during the mixing between cold groundwater and the thermal waters. In the upstream  
644 area, the groundwater samples (e.g. G7, G23, G25) have feature of  $\text{Ca}\cdot\text{Mg}\cdot\text{Na-Cl}\cdot\text{SO}_4$ ,  $\text{Ca-Cl}\cdot\text{SO}_4$ , and  
645  $\text{Ca-Cl}\cdot\text{HCO}_3$  type, not the  $\text{Ca-HCO}_3$  type in the 1980s. It suggests that the salinized composition has  
646 resulted from the anthropogenic pollution. The groundwater samples (e.g. G10, G11, G15, G26) collected  
647 from the well field show the feature of  $\text{Cl-Na}\cdot(\text{Ca})$  type water with TDS 1.2–4.8 g/L. The samples (e.g. G1,  
648 G2, G3, G4, G12, G22, G14, G14') collected from the coastal zone show the water type of  $\text{Na-Cl}$  or  
649  $\text{Na}\cdot\text{Ca-Cl}\cdot\text{SO}_4$  or  $\text{Ca}\cdot\text{Na}\cdot\text{Mg-Cl}\cdot\text{SO}_4$ , indicating that, apart from seawater intrusion, the anthropogenic  
650 pollution also plays important role on modifying the groundwater chemistry.

651 The seawater from Bohai Sea has is heavily affected by nutrient contamination, showing relatively

652 ~~higher~~  $\text{NO}_3^-$  concentrations ~~of~~ (810 mg/L in this study, ~~and~~ up to 1092 mg/L in ~~the coastal~~ seawater ~~further~~  
653 ~~north of the bay near of~~ Dalian (~~–~~Han et al., 2015), ~~primarily~~ due to wastewater discharge into the sea.  
654 ~~The historic sampled~~  $\text{NO}_3^-$  concentration of groundwater in the well field increased from 5.4 mg/L in May  
655 1985 to 146.8–339.4 mg/L in Aug 2010, while the concentration ~~of in~~ seawater ~~in this area~~ changed from  
656 57.4 mg/L in May 1985 to 810.1 mg/L in Aug 2010. ~~The diagram~~ A bivariate plot (Fig. 7) of  $\text{Cl}^-$  vs.  $\text{NO}_3^-$   
657 concentrations ~~of in~~ groundwater (Fig. 10) can ~~thus~~ –be used to identify ~~nitrate sources and the different~~  
658 mixing trends ~~in this study area~~, including ~~the mixing process with~~ infiltration with contaminated seawater,  
659 ~~and and other on-land the~~ anthropogenic  $\text{NO}_3^-$ -sources (e.g. domestic/industrial wastewater discharge ~~and/or~~  
660  $\text{NO}_3^-$ -bearing fertilizer input through ~~precipitation infiltration and the~~ irrigation return-flow) ~~in the inland~~  
661 ~~area~~.

662 ~~It can be seen from Fig. 7~~ this plot (Fig. 10) it appears that ~~that~~ the major source of  $\text{NO}_3^-$  in  
663 groundwater is ~~from on-land~~ anthropogenic inputs rather than mixing with seawater, which would result in  
664 relatively large increases in  $\text{Cl}^-$  along with  $\text{NO}_3^-$ , ~~with the exception of~~ Samples G10 and G15 (from the well  
665 field) are exceptions to this trend, ~~mixing~~ – showing clear mixing with ~~nitrate-contaminated~~ seawater ~~in the~~  
666 well field. ~~The d~~ Deep groundwater (e.g. G9, G14<sup>2</sup>) is also ~~extensively~~ contaminated ~~by with~~ higher  $\text{NO}_3^-$   
667 concentrations; ~~this which~~ is likely associated with ~~leakage from the surface via~~ the poorly constructed or  
668 abandoned wells – a problem of growing significance in China (see Han et al., 2016b; Currell and Han,  
669 2017). According to one investigation by Zang et al.(2010), 14 of 21 pumping wells in the Zaoyuan well  
670 field have been abandoned due to ~~the salinized~~ poor water quality, and 307 pumping irrigation wells  
671 (occupied 2/3 of total pumping wells for irrigation) ~~in the region~~ have ~~also~~ been abandoned. ~~However, the~~  
672 ~~Local department authorities~~ ~~haves~~ ~~however~~ not ~~made any~~ implemented measures to deal with ~~those~~  
673 abandoned wells, ~~meaning they are a future legacy contamination risk – e.g. by allowing surface runoff~~  
674 ~~impacted by nitrate contamination to infiltrate down well annuli~~.

### 675 5.2.3 ~~Groundwater salinization processes~~ Hydrochemical evolution during salinization –

676 ~~A hydrogeochemical facies evolution diagram (HFE-D) proposed by Giménez-Forcada (2010), was~~  
677 ~~used to analyze the geochemical evolution of groundwater during seawater intrusion and/or freshening~~  
678 ~~phases (Fig. 11).~~ In the coastal zone, the river water shows an obvious mixing trend between fresh and  
679 ~~saline end members. Some shallow groundwaters (e.g., G2, G4, G10, G13, G15) are also close to the~~  
680 ~~mixing line between the surface-water end-members on this figure, indicating mixing with seawater~~

681 without significant additional modification by typical water-rock interaction processes (e.g. ion exchange).  
682 Most brackish groundwaters (e.g., G11, G16, G17, G20, G25, G28, G29) have evolved in the series  
683 Ca-HCO<sub>3</sub> → Ca-Cl → Na-Cl, according to classic seawater intrusion. A relative depletion in Na (shown in  
684 lower than marine Na/Cl ratios) and enrichment in Ca (shown as enriched Ca/SO<sub>4</sub> ratios) is evident in  
685 groundwater with intermediate salinities (e.g. Fig. 88; Fig. 101), indicating classic base-exchange between  
686 Na and Ca during salinization (Appelo and Postma, 2005). Locally, certain brackish water samples (e.g.,  
687 G1, G12, G26) appear to plot in the ‘freshening’ part of the HFE diagram (potentially indicating slowing or  
688 reversal of salinisation due to reduced groundwater use), although these do not follow a conclusive  
689 trajectory. Water samples from the geothermal field (G5, G8, G9, and G19) plot in a particular corner of the  
690 HFE diagram away from other samples (being particularly Ca-rich); a result of their distinctive  
691 geochemical evolution during deep transport through the basement rocks at high temperatures.–

### 692 ***5.2.1 Development of seawater intrusion and associated hydrochemical behavior***

693 ~~The intensively pumping groundwater from the Quaternary aquifer of Yang Dai River coastal plain~~  
694 ~~has resulted in the development of groundwater depression cones from Zaoyuan well field to Fangezhuang,~~  
695 ~~with the aggravation of seawater intrusion in this region. In the 1950s, the seawater intrusion in the study~~  
696 ~~area was only occurred within 2 km distance from the coastline, and it expanded to over 5 km distance in~~  
697 ~~the 1980s. In 1986, the groundwater depression cone centered in the Zaoyuan well field was characterized~~  
698 ~~by 6 meters depths below the sea level, with the water level 3 m.a.s.l. The enclosed area by 0 m.a.s.l water~~  
699 ~~level contours covered 10 km<sup>2</sup>. The original Ca-HCO<sub>3</sub> type water changed to Ca-Na-Cl type. Apart from~~  
700 ~~the intensive exploitation fresh groundwater from coastal aquifer, the successive drought (1976-1989) also~~  
701 ~~played important roles on controlling the groundwater recharge and exacerbating seawater intrusion in the~~  
702 ~~coastal area of north China (Wilhite, 1993; Han et al., 2015). In this study area, the annual mean~~  
703 ~~precipitation was 668.7 mm during 1954-1995, the Cl concentrations was ranging from 130 to 170 mg/L in~~  
704 ~~the Zaoyuan well field. Whereas the annual mean precipitation reduced to 559.7 mm during 1996-2011,~~  
705 ~~resulting in Cl concentration in the well field up to 550 mg/L in May 1986, and 812 mg/L in July 2006. It~~  
706 ~~has seriously threatened the safety of water supply in this region. The seawater intrusion in the coastal~~  
707 ~~aquifer shows the wedge shaped body and has vertically characterized by freshwater in the upper part and~~  
708 ~~salt water in the lower part of shallow aquifer. Since 2002, with the establishment of anti-tide dam in the~~  
709 ~~Yang River estuary area, it has good effect on preventing the horizontal pouring seawater into riverway.~~



710 Thus, the seawater intrusion is mainly caused by lateral inflow of seawater in the aquifer.

711 According to the guidelines of drinking water standards from China Environmental Protection  
712 Authority (GB 5749-2006) or US EPA or WHO, the guideline of chloride concentration for drinking water  
713 is 250 mg/L. Most groundwater distributed in the seawater intrusion area cannot be used for irrigation, the  
714 source of drinking water and industrial utilization. It has enhanced the scarcity of fresh water resources in  
715 this region by vicious cycle of groundwater level decline → seawater intrusion → groundwater salinization  
716 → groundwater level decline again. This will also influence the surface water runoff. How to judge the  
717 criterion of seawater intrusion? Generally, 250 mg Cl/L can be regarded as the intruded standard, and more  
718 than 1000 mg Cl/L as the serious intrusion (Jiang and Li, 1997; Zhuang et al., 1999). Some studies took the  
719 TDS (>1000 mg/L) as the intruded standard (e.g., Xue et al., 1997; Zhang and Peng, 1998). Water type can  
720 also be used as the intruded standard, such as Ca-Cl type water occurs during seawater intrusion into  
721 freshwater aquifers, and Na-HCO<sub>3</sub> type water displays during flushing of the mixing zone by freshwater  
722 (Appleo and Postma, 1993). Additionally, the multi-hydrochemical ionic ratios can also provide important  
723 confirmation of hydrogeochemical processes modifying groundwater chemistry during seawater intrusion  
724 (Vengosh et al., 1997; Jones et al., 1999). However, the frequent anthropogenic activities modified coastal  
725 hydrologic dynamics and hydrogeochemical characteristics to great extent. For instance, with except of  
726 modern seawater, the sources of chloride in groundwater system could be derived from paleoseawater relies  
727 in aquifers, infiltration of agricultural return flow with fertilizer solutions, and discharge of industrial and  
728 domestic wastewater.

729 Hydrogeochemical facies evolution diagram (HFE-D) proposed by Giménez Forcada (2010) can be  
730 used to analyze the phase of seawater intrusion or freshening and its dynamics. From Fig. 8, it can be seen  
731 that most brackish groundwaters (e.g., G11, G16, G17, G20, G25, G28, G29) have evolved in the series of  
732 Ca-HCO<sub>3</sub> → Ca-Cl → Na-Cl facies under the intrusion period. Locally, several water samples (e.g., G1,  
733 G12, G26) collected from the interfluvial area have been characterized by freshening process. Deep  
734 groundwater G11 sampled from the well field shows being under salinizing period in the relatively dry  
735 season, and under freshening period in the relatively wet season. In the coastal zone, the river water has  
736 obvious mixing trend between end-members. Some shallow groundwaters (e.g., G2, G4, G10, G13, G15)  
737 are close to the mixing line between end-members on this figure, indicating significant mixing with  
738 seawater. The groundwaters (G10, G11, G15, G26) collected from the productive wells of the Zaoyuan  
739 well field display the different processes occurring in salinizing or freshening stages, indicating that the

740 heterogeneous hydrogeological conditions could be responsible for this distinguished patterns.

741 The calculated results of saturated indices (Fig. 9) show that that  $SI_{\text{calc}}$  and  $SI_{\text{dol}}$  have some deviation  
742 from equilibrium (-0.4 to +0.5 for  $SI_{\text{calc}}$ , and -0.5 to +0.5 for  $SI_{\text{dol}}$ ). The distribution of  $SI_{\text{calc}}$  and  $SI_{\text{dol}}$  is  
743 related to the sampling period. In the wet season, most of water samples are characterized by  $SI_{\text{calc}} < 0$  and  
744  $SI_{\text{dol}} < 0$ , suggesting they are under unsaturated for these minerals, while in the dry season, most of water  
745 samples are under saturated with respect to these minerals. In contrast, all sampled groundwater had  
746 negative saturation indices with respect to gypsum ( $SI_{\text{gyp}} < 0$ ), indicating that these water samples are  
747 under saturated with respect to gypsum. The plots (Fig. 10 a-f) of ionic molar ratios ( $\text{Na}/\text{Cl}$ ,  $\text{SO}_4/\text{Cl}$ ,  $\text{Mg}/\text{Ca}$ ,  
748  $\text{Ca}/(\text{SO}_4+\text{HCO}_3)$ ,  $\text{Ca}/\text{SO}_4$ , and  $(\text{Ca}+\text{Mg})/\text{Cl}$ ) can be used to further reveal the groundwater salinized  
749 processes and dominated hydrochemical behavior. The brackish groundwaters in this study area have an  
750 enriched  $\text{Ca}^{2+}$  (i.e., the ratio of  $\text{Ca}/(\text{HCO}_3+\text{SO}_4) > 1$  with low ratios of  $\text{Na}/\text{Cl}$  and  $\text{SO}_4/\text{Cl}$  as the seawater  
751 proportion in the mixture increases. As shown in Fig. 10a,  $\text{Na}/\text{Cl}$  ratios of brackish groundwater affected by  
752 seawater intrusion are usually lower than the ratio (0.86) of modern seawater. The high  $\text{Na}/\text{Cl}$  ratios ( $> 1$ )  
753 could be typical of anthropogenic sources (i.e., domestic waste waters). When seawater intrudes into  
754 coastal freshwater aquifers,  $\text{Ca}^{2+}$  on the clay bearing sediments can be replaced by  $\text{Na}^+$ :

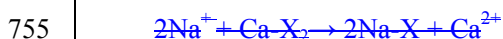

756 This process can decrease the  $\text{Na}/\text{Cl}$  ratios and increase the  $(\text{Ca}+\text{Mg})/\text{Cl}$  ratios. The dolomitization  
757 process can be described by the transformation reaction (Appelo and Postma, 2005):

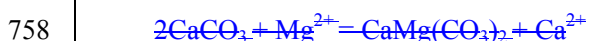

759 It can result in Ca enrichment over Mg in solution and that  $\text{Mg}/\text{Ca}$  ratios decreases. This process may  
760 also be characterized by Ca-Cl water type.

761 To explain the enrichment in  $\text{Ca}^{2+}$  relative to  $\text{SO}_4^{2-}$  concentrations, observed in most water samples  
762 (Fig. 10e), gypsum dissolution ( $SI_{\text{gyp}} < 0$ ) can be coupled by cation exchange reactions under the interaction  
763 with clay stratum and calcite precipitation with incongruent dissolution of dolomite and gypsum.  
764 Additionally, due to the ORP values ranging from 3 to 74 mV for 18 of 22 water samples collected in  
765 August 2010, the sulfate reduction under anaerobic conditions may be responsible for relatively high  
766  $\text{Ca}/\text{SO}_4$  and low  $\text{SO}_4/\text{Cl}$  ratios. Generally, low  $\text{Na}/\text{Cl}$ ,  $\text{SO}_4/\text{Cl}$  and high  $\text{Ca}/(\text{HCO}_3+\text{SO}_4)$  ( $> 1$ ) ratios are  
767 further indicator of the arrival of seawater intrusion.

768  $\Delta\text{Na}$  is negative in most samples of this area (Fig. 11a and Fig. 12a). The depletion of  $\text{Na}^+$  could be  
769 caused by the inverse cation exchange taken place with the clay sediments. This exchange produces Ca

770 release to the solution during the seawater intrusion. The positive  $\Delta\text{Ca}$  and  $\Delta\text{Mg}$  may be due to the  
771 dissolution of calcite, dolomite and gypsum present in the aquifer strata. Water flushing during aquifer  
772 recharge can result in positive  $\Delta\text{Na}$  and negative  $\Delta\text{Ca}$  and/or  $\Delta\text{Mg}$  (Fig. 11a). For some water samples, the  
773 Ca enrichment is not accompanied by Na depletion, which could be caused by dolomitization (Ca  
774 enrichment with Mg depletion) (Fig. 12b). The excess of  $\text{SO}_4$  compared to conservative mixing (Fig. 11d)  
775 can be explained by redissolution of the precipitated gypsum along the mixing front.

### 776 ***5.2.2 Mixing between thermal and cold groundwater***

777 Sea level rose by about 100 m since the end of the last glacial period (18,000 years, 18 ka BP) and  
778 stabilized around 5 ka BP in the eastern China (Yang, 1996). The marine sediments could not be found in  
779 the geothermal field, indicating the transgression in the geologic history did not occur around Danihe area  
780 (Zeng, 1991). However, the fracture and structural fissure developed well in this study area became the  
781 major subsurface pathway of seawater intrusion. The previous studies have revealed that the geothermal  
782 waters in this area are characterized by the features of residual seawater and modern precipitation (Zeng,  
783 1991; Hui, 2009). The results of  $^{14}\text{C}$  age dating for the geothermal waters in this area are ranging from 3.4  
784 ka to 12.8 ka with lower tritium contents (less than 2TU) (Zeng, 1991). The Piper plot (Fig. 5) shows  
785 CaNa-Cl type water for the geothermal waters. It is noteworthy that the geothermal water from Danihe  
786 geothermal field has higher Sr concentrations (up to 89.8 mg/L) relative to that in seawater (5.4–6.5 mg/L in  
787 this study), due to the Sr-bearing minerals (i.e., celestite, strontianite) with Sr contents of 300–2000 mg/kg  
788 present in the bedrock (Hebei Geology Survey, 1987). The mixture waters sampled from the geothermal  
789 field in this study also have the higher Sr concentrations relative to seawater, i.e., G9 with Sr concentrations  
790 ranging from 7.4 to 11.6 mg/L, and G19 from 4.9 to 7.1 mg/L. The diagram of chloride versus strontium  
791 concentrations of different water samples (Fig. 13) shows that the groundwater samples (e.g., G9, G19)  
792 collected from the geothermal field have obviously been characterized by closing to mixing line between  
793 fresh cold and thermal groundwater. Some waters (G16, G20, G29) sampled from the downstream area  
794 also close to this mixing line, indicating the thermal water overflows into the coastal aquifers in different  
795 depths. The water samples collected from the well field are located between two mixing lines (Fig. 13),  
796 suggesting the groundwater in the well field simultaneously suffered from the mixing with thermal water  
797 and obvious seawater intrusion. Additionally, the points of water samples (G5, G8, G9, and G19), collected  
798 from the geothermal field, mainly occurs on the HFE-D (Fig. 8) in the *I2* (MixCa-Cl) and *I6* (Ca-Cl) facies  
799 zones, indicating these waters have been modified by the reverse base exchange reactions.

800 As both Cl and Br are not affected by water-rock interactions and usually behave conservatively, the  
801 Cl/Br ratio can be used as a reliable tracer to study the processes of evaporation and salinization of water  
802 (Edmunds, 1996; Jones et al., 1999). Standard seawater (Cl/Br molar ratio=650.8) may be distinguished  
803 from relics of evaporated seawater (normally less than 669.3), input of evaporite dissolution (more than  
804 2256) and anthropogenic pollution (e.g., sewage effluents, Cl/Br ratios up to 1805; Vengosh and Pankratov,  
805 1998) or agricultural return flows with low Cl/Br ratios (Jones et al., 1999). It can be seen from Fig. 14 that  
806 the points of the thermal waters lie lower than the ratio line of standard seawater, indicating that they are  
807 affected by mixing with relics of evaporated seawater. The points of cold groundwaters (G9, G19) sampled  
808 from the geothermal field display between the seawater and the thermal waters, indicating these cold waters  
809 are mixture between cold groundwater and the thermal water, which has relics of evaporated seawater.  
810 However, it cannot exclude adding the Br inputs into groundwater system through the pesticides  
811 application of the pronounced agricultural activity (Davis et al., 1998), this effect could lower the Cl/Br  
812 ratios of the groundwaters. The groundwater sample G10 in the well field shows the feature of high Cl/Br  
813 ratio in Fig. 14, indicating obvious anthropogenic inputs (e.g., discharge domestic wastewater) occurring in  
814 the shallow aquifers around the well field.

### 815 ***5.2.3 Interaction between surface and ground water***

816 Coastal zones encompass the complex interaction among different waters (i.e., river water, seawater,  
817 groundwater, rainfall water). The interaction between surface and ground water in the Yang-Dai River  
818 coastal plain is usually ignored by the previous studies. However, understanding how surface water  
819 interacts with the groundwater is essential for managing freshwater resources. Groundwater depression  
820 cone below the sea level has formed in the early 1980s. Due to the irrigation supported by transfer of  
821 surface water from the upper and middle stream of Yang-Dai River, the amount of surface water discharged  
822 into the Bohai Sea declined to great extent. Under the tide effects, seawater can be poured into the estuary  
823 of the downstream section of the rivers, resulting in the river bed filled with saltwater, which can cause  
824 mixing between river water and seawater. The results of water chemistry analysis from two river sections  
825 show that the distribution of salt water reached more than 10 km above the estuary of the Yang River, and  
826 about 4 km above the estuary of the Dai River (Han, 1988). It led to that the seawater simultaneously  
827 intruded into the coastal aquifers through not only the lateral subsurface flow from coastline to the inland  
828 but also vertical infiltration from the riverbed to both sides of the river. The hazard caused by the latter  
829 pattern had been more serious than the former pattern, before the establishment of anti-tide dam at the

830 estuary of Yang River. Currently, the seawater intruded distance towards inland has been controlled within  
831 4 km away from the coastline.

832 The stable isotope compositions of different water samples (Fig. 4) display that the points of most  
833 surface water samples are deviated from the LMWL to the right, indicating that these waters are likely to be  
834 subject to evaporation to different degrees. The points of surface water samples (S1, S2, S3, and S7) in  
835 Fig.4 close to the compositions of local seawater, indicating the pronounced mixing process with seawater  
836 for these surface waters. However, the samples S2, S6, S8, and S9 have the depleted compositions of stable  
837 isotopes, probably resulting from the exchange between them and local groundwater. S12, located at the  
838 estuary area, has variable compositions due to the sampling seasons. HFE-D shows that most of surface  
839 water samples are close to the mixing line between end members (freshwater and seawater). S9 is  
840 significantly characterized by salinization process probably due to the interaction with ambient  
841 groundwater. It can be seen from the relationship between ionic delta values and seawater proportions for  
842 the water samples (Fig. 11) that G1, G11, G12, G14', G26, G29, due to these wells close to the river or  
843 located at the flat interfluvium, may be dominated by the obvious freshening process. While G2, G3, and G16  
844 under the salinizing process could be subject to the vertical infiltration of saltwater in the river. The points  
845 of surface waters (S1, S2, S3, and S7) on Fig. 4 and Fig. 8 are distributed along the mixing line between  
846 fresh and sea water end members. It is due to the direct mixture occurs in the riverway. S12 sampled from  
847 the Dai River estuary may be contaminated by the wastewater discharge with higher Sr concentration  
848 relative to seawater. By contrast, surface water from the Dai River have higher seawater proportions  
849 compared with that from Yang River, owing to that the local government did not establish anti-tide dam in  
850 the Dai River estuary. G1, G2, G3, G10 and G13 collected from coastal zone are obviously mixed with  
851 seawater with closing to the mixing line between seawater and freshwater in Fig. 13.

#### 852 5.3-4 Conceptual model of groundwater flow patterns, salinization and management 853 implications-

854 Generally, groundwater in this study area is mainly originated from precipitation, river  
855 infiltration, lateral subsurface runoff, upflow of geothermal waters and seawater intrusion in  
856 the coastal area. The associated hydrological processes driven by the natural (hydrologic,  
857 geologic, climatic) changes and anthropogenic activities have resulted in groundwater  
858 salinization processes, along with the complex hydrogeochemical characteristics of  
859 groundwater system. Groundwater changes from Ca-HCO<sub>3</sub> type water in the piedmont area to  
860 the Na-Cl type water in the coastal area.

861 Coastal zones encompass the complex interaction among different water bodies (i.e., river water,

862 seawater and groundwater). The interactions between surface- and ground-water in the Yang-Dai River  
863 coastal plain have generally been ignored in previous studies. However, the surface water chemistry data  
864 show that the distribution of salt water has historically reached more than 10 km inland along the estuary of  
865 the Yang River, and approximately 4 km inland in the Dai River (Han, 1988). The relatively higher  
866 proportion of seawater-intrusion derived salinity in shallow samples in this study, along with the evidence  
867 from resistivity surveys (Fig. X6; Zuo, 2006) indicate that intrusion by vertical leakage from these estuaries  
868 is therefore an important process. The hazard associated with this pathway in recent times has been reduced  
869 by the construction of a tidal dam, which now restricts seawater ingress along the Yang estuary to within 4  
870 km of the coastline. This may alleviate salinization to an extent in future in the shallow aquifer by  
871 removing one of the salinization pathways, however, as described, there are multiple other salinization  
872 processes impacting the groundwater in the Quaternary aquifers of the region.

873 A conceptual model of the groundwater flow system in the Yang-Dai River coastal plain can be  
874 summarized in Fig. 15122. This model presents an advance on the previous understanding of the study area,  
875 by delineating four subsurface major processes responsible for groundwater salinization in this area.  
876 These are: 1. Seawater intrusion by lateral sub-surface flow; 2. Interaction between saline  
877 surface water and groundwater (e.g. vertical leakage of saline water from the river estuaries); 3. ;  
878 return flow of agricultural irrigation, mixing with between low-temperature groundwater and deep  
879 geothermal water; and, 4. Irrigation return-flow and associated anthropogenic contamination interaction  
880 between surface water and groundwater/seawater, could be responsible for the groundwater salinization in  
881 this area. Both the lateral and vertical intrusion of saline water are driven by the long-term over-pumping of  
882 groundwater from fresh aquifers in the region. The Two aspects of seawater intrusion, identified by  
883 depleted  $\Delta\text{Na}$  and enriched  $\Delta\text{Ca}$  with Ca-Cl type water and  $\text{Ca}/(\text{HCO}_3 + \text{SO}_4) > 1$  and lower Na/Cl and  
884  $\text{SO}_4/\text{Cl}$  relative to these ratios of seawater, can be delineated, namely vertical infiltration of saltwater inflow  
885 towards the inland estuary and lateral inflow of seawater driven by over-pumping groundwater from fresh  
886 aquifers. Irrigation return-flow from local groundwater agriculture can results from over-irrigation of crops,  
887 and is responsible for cause groundwater extensive nitrate pollution (up to 340 mg/L  $\text{NO}_3^-$  in groundwater  
888 of this area) due to the infiltration and probably due to dissolution of fertilizers during infiltration. The  
889 somewhat enriched stable isotopes in shallow groundwater (more pronounced in the dry season) also  
890 indicate that such return-flow may recharge water impacted by evaporative salinization into the aquifer.  
891 The geothermal water, with distinctive chemical composition (e.g. depleted stable isotopes, high TDS,

892 Ca, F, and Sr concentrations), is also demonstrated in this study to be a significant contributor to  
893 groundwater salinization, via upward mixing. The study area is therefore in a situation of unusual  
894 vulnerability, in the sense that it faces salinization threats simultaneously from lateral, downward and  
895 upward migration of saline water bodies.—

896 According to drinking water standards and guidelines from China Environmental Protection Authority  
897 (GB 5749-2006) and/or US EPA and WHO, chloride concentration in drinking water should not exceed 250  
898 mg/L. At the salinity levels observed in this study - many samples impacted by salinization  
899 contain >500mg/L of chloride (Table 1) - a large amount of groundwater is now or will soon be unsuitable  
900 for domestic usage, as well as irrigation or industrial utilization. So far, this has enhanced the scarcity of  
901 fresh water resources in this region, leading to a cycle of groundwater level decline → seawater intrusion  
902 → loss of available freshwater → increased pumping of remaining fresh water. If this cycle continues, it is  
903 likely to further degrade groundwater quality and restrict its usage in the future. Such a situation is typical  
904 of the coastal water resources ‘squeeze’ highlighted by Michael et al., (2017). Alternative management  
905 strategies, such as restricting water usage in particular high-use sectors, such as agriculture, industry or  
906 tourism, that are based on a comprehensive assessment of the social, economic and environmental benefits  
907 and costs of these activities, warrants urgent and careful consideration.—

908 ~~flows into the Quaternary aquifers, mixing with cold groundwater, and transports to the downstream~~  
909 ~~area of Yang River Basin. Additionally, the interaction between surface and ground water can cause~~  
910 ~~seasonal flushing local groundwater in the upstream interfluvium or lead to saltwater infiltration affected by~~  
911 ~~tide/surge along the riverbed at the estuary.~~

## 912 **6. Conclusions**

913 ~~It has been recognized that g~~Groundwater in the Quaternary aquifers of the Yang-Dai River coastal  
914 plain is ~~the an~~ important water resource for agricultural irrigation, ~~urban and domestic use (including for~~  
915 ~~tourism) - tourism development~~ and industrial ~~utilization~~activity. ~~Natural climate change (e.g., continuous~~  
916 ~~drought, overflow of geothermal water) and Extensive groundwater utilization human activities have~~has  
917 made the problem of groundwater salinization in this area increasingly prominent, ~~even~~resulting in the  
918 closure of ~~the Zaoyuan well field~~wells in the area. Based on the analysis of hydrochemical and stable  
919 isotopic compositions of different water bodies, ~~including surface water, cold groundwater, geothermal~~  
920 ~~water, and seawater,~~we delineated the ~~key groundwater flow system and~~groundwater salinization

921 processes. Seawater intrusion is the main ~~aspect-process~~ responsible for ~~the groundwater~~ salinization in the  
922 coastal ~~zone,zone;~~ ~~however this likely~~ includes ~~ing the~~ vertical saltwater infiltration along the riverbed into  
923 aquifers, ~~which is affected by the tide/surge process, and as well as the~~ lateral seawater intrusion caused by  
924 pumping for fresh groundwater ~~at the Zaoyuan wellfield~~. The ~~overflow-upward mixing~~ of ~~the~~ highly  
925 mineralized thermal water into the Quaternary aquifers ~~along the fault zone mixes with the cold~~  
926 ~~groundwater and makes it salinized~~ is also evident, particularly through the use of stable isotope, chloride  
927 ~~and strontium end-member mixing analysis~~. ~~Additionally, significant~~ ~~The thermal water has characterized~~  
928 ~~by lower Cl/Br ratios and higher Sr concentrations relative to seawater. It cannot be ignored that the~~  
929 ~~salinization or~~ nitrate pollution from the anthropogenic activities (e.g., agricultural irrigation return-flow  
930 with ~~dissolution of fertilizers~~) ~~and locally, intrusion of heavily polluted seawater, are also evident.~~  
931 ~~Additionally, the interaction between surface and ground water can also affect the groundwater~~  
932 ~~salinization in this area. Different approaches of hydrochemical analysis, such as Piper plot, HFE-D, major~~  
933 ~~ionic ratios (Na/Cl, SO<sub>4</sub>/Cl, Ca/SO<sub>4</sub>, (Ca+Mg)/Cl, Ca/(SO<sub>4</sub>+HCO<sub>3</sub>), Cl/Br) and Sr, were used in this study~~  
934 ~~to identify the different hydrogeochemical reactions and freshening or salinizing processes in the~~  
935 ~~Quaternary aquifers.~~

936  
937 Groundwater salinization has become a prominent water environment problem in the coastal areas of  
938 northern China (Han et al., 2014; Han et al., 2015; Han et al., 2016a), ~~which has caused the and threatens to~~  
939 ~~create~~ further paucity of fresh water resources, ~~which may prove a significant impediment to further social~~  
940 ~~and economic~~ ~~and has become the bottleneck of urban development in these regions to a certain extent.~~  
941 Since the 1990s, the local government has begun to pay attention to the ~~development problem~~ of seawater  
942 intrusion, and ~~the~~ irrational exploitation ~~of groundwater~~ has been restricted ~~in some cases~~. The Zaoyuan  
943 well field ~~has~~ ceased to pump groundwater since 2007, ~~while an~~ ~~The~~ anti-tide dam (~~designed to protect~~  
944 ~~against tidal surge events~~) ~~has been~~ established in the Yang River estuary ~~area in 2002,~~ ~~may also reduce~~  
945 ~~saline intrusion effectively intercepting the seawater pouring into riverway during the tide/surge period in~~  
946 ~~future. However, due to the significant lag-time associated with groundwater systems, a response in terms~~  
947 ~~of water quality may take time to emerge, and in the meantime the other salinization and pollution impacts~~  
948 ~~documented here may continue to threaten water quality~~ ~~These actions have made the rate of intrusion~~  
949 ~~slowed down. The joint use of surface water and groundwater with reasonable exploitation program is~~  
950 ~~essential and economical for the local water resources management.~~ ~~In this regard, we recommend~~ ~~However,~~



951 ~~the quantitative understanding to the vertical and lateral saltwater intrusion into fresh aquifers~~  
952 ~~continued monitoring of groundwater quality and levels, and active programs to reduce input of anthropogenic~~  
953 ~~contaminants such as nitrate from fertilizers, and appropriate well-construction and decommissioning~~  
954 ~~protocols to prevent contamination through preferential pathways.~~  
955 ~~—should be obtained from further continuous groundwater monitoring and numerical groundwater flow~~  
956 ~~and transport modeling. This study would benefit the local agricultural development and groundwater~~  
957 ~~resources management.~~

## 958 **Acknowledgement**

959 This research was supported by Zhu Kezhen Outstanding Young Scholars Program in the Institute of  
960 Geographic Sciences and Natural Resources Research, Chinese Academy of Sciences (CAS) (grant number  
961 2015RC102), and Outstanding member program of the Youth Innovation Promotion Association, CAS  
962 (grant number 2012040). The authors appreciate the helpful field work and data collection made by Mr  
963 Yang Jilong from Tianjin Institute of Geology and Mineral Resources, Dr. Wang Peng and Dr Liu Xin from  
964 Chinese Academy of Sciences.  
965

## 966 **References**

- 967 An T.D., Tsujimura M., Phu V.L., Kawachi A., Ha D.T., 2014. Chemical Characteristics of Surface Water  
968 and Groundwater in Coastal Watershed, Mekong Delta, Vietnam. The 4<sup>th</sup> International Conference on  
969 Sustainable Future for Human Security, SustaiN 2013. Procedia Environmental Sciences. 20:712-721.
- 970 [Andersen, M.S., Jakobsen, V.N.R., Postma, D. 2005. Geochemical processes and solute transport at the](#)  
971 [seawater/freshwater interface of a sandy aquifer. \*Geochimica et Cosmochimica Acta.\* 69\(16\):](#)  
972 [3979-3994.](#)
- 973 Appelo C. A. J., Postma D., 1993. *Geochemistry, Groundwater and Pollution*, first edition. A. A. Balkema,  
974 Brookfield, Vt.
- 975 Appelo C.A.J., 1994. Cation and proton exchange, pH variations, and carbonate reactions in a freshening  
976 aquifer. *Water Resour. Res.*, 30, 2793-2805.
- 977 Appelo C.A.J., Postma D., 2005. *Geochemistry, Groundwater and Pollution*, second edition. Taylor &  
978 Francis Group.
- 979 Bao J., 2005. Two-dimensional numerical modeling of seawater intrusion in Qinhuangdao Region. Master's  
980 Thesis. Tongji University, Shanghai, China. (Chinese with English abstract)
- 981 Barbécot F., Marlin C., Gibert E., Dever L., 2000. Hydrochemical and isotopic characterisation of the  
982 Bathonian and Bajocian coastal aquifer of the Caen area (northern France). *Applied Geochemistry.*  
983 15:791-805.
- 984 Bobba A.G., 2002. Numerical modelling of salt-water intrusion due to human activities and sea-level  
985 change in the Godavari Delta, India. *Hydrological Sciences.* 47(S), S67-S80.
- 986 Bobba A.G., 2002. Numerical modelling of salt-water intrusion due to human activities and sea-level  
987 change in the Godavari Delta, India. *Hydrological Sciences.* 47(S), S67-S80.
- 988 Bouchaou L., Michelot J.L., Vengosh A., Hsissou Y., Qurtobi M., Gaye C.B., Bullen T.D., Zuppi G.M.,  
989 2008. Application of multiple isotopic and geochemical tracers for investigation of recharge,

990 salinization, and residence time of water in the Souss–Massa aquifer, southwest of Morocco. *Journal*  
991 *of Hydrology*. 352: 267-287.

992 Brockway R., Bowers D., Hogue A., Dove V., Vassele V., 2006. A note on salt intrusion in funnel-shaped  
993 estuaries: Application to the Incomati estuary, Mozambique. *Estuarine, Coastal and Shelf Science*.  
994 66:1-5.

995 Cary L., Petelet-Giraud E., Bertrand G., Kloppmann W., Aquilina L., Martins V., Hirata R., Montenegro S.,  
996 Pauwels H., Chatton E., Franzen M., Aurouet A., the Team. Origins and processes of groundwater  
997 salinization in the urban coastal aquifers of Recife (Pernambuco, Brazil): A multi-isotope approach.  
998 *Science of the Total Environment*. 530-531:411-429.

999 Chen M., Ma F., 2002. Groundwater resources and the environment in China. Seismological Press. Beijing.  
1000 pp255-281. (in Chinese)

1001 Craig, H., 1961. Standard for reporting concentration of deuterium and oxygen-18 in natural water. *Science*  
1002 133, 1833–1834.

1003 Creel L., 2003. Ripple effects: Population and coastal regions. Population Reference Bureau. pp1-7.<  
1004 <http://www.prb.org/Publications/Reports/2003/RippleEffectsPopulationandCoastalRegions.aspx>>

1005 [Currell M.J., Cartwright, I., Bradley, D.C., Han, D.M., 2010. Recharge history and controls on groundwater](#)  
1006 [quality in the Yuncheng Basin, north China. \*Journal of Hydrology\*. 385: 216-229.](#)

1007 [Currell M.J., Dahlhaus P.D., Ii H. 2015. Stable isotopes as indicators of water and salinity sources in a](#)  
1008 [southeast Australian coastal wetland: identifying relict marine water, and implications for future](#)  
1009 [change. \*Hydrogeology Journal\*. 23: 235-248.](#)

1010 [Currell M.J., Han D. 2017. The Global Drain: Why China’s water pollution problems should matter to the](#)  
1011 [rest of the world. \*Environment: Science and Policy for Sustainable Development\*. 59\(1\): 16-29.](#)

1012 de Montety V., Radakovitch O., Vallet-Coulomb C., Blavoux B., Hermitte D., Valles V., 2008. Origin of  
1013 groundwater salinity and hydrogeochemical processes in a confined coastal aquifer: Case of the Rhône  
1014 delta (Southern France). *Applied Geochemistry*. 23: 2337-2349.

1015 Edmunds W. M., 1996. Bromine geochemistry of British groundwaters. *Mineral. Mag.*, 60, 275–284.

1016 El Yaouti F., El Mandour A., Khattach D., Benavente J., Kaufmann O., 2009. Salinization processes in the  
1017 unconfined aquifer of Bou-Areg (NE Morocco): A geostatistical, geochemical, and tomographic study.  
1018 *Applied Geochemistry*. 24:16-31.

1019 Ferguson G., Gleeson T., 2012. Vulnerability of coastal aquifers to groundwater use and climate change.  
1020 *Nature Climate Change*. 2, 342-345.

1021 Fidelibus M.D., Giménez E., Morell I., Tulipano L., 1993. Salinization processes in the Castellon Plain  
1022 aquifer (Spain). In: Custodio, E., Galofré, A. (Eds.), *Study and Modelling of Saltwater Intrusion into*  
1023 *Aquifers*. Centro Internacional de Métodos Numéricos en Ingeniería, Barcelona, pp267-283.-

1024 Garing C., Luquot L., Pezard P.A., Gouze P., 2013. Geochemical investigations of saltwater intrusion into  
1025 the coastal carbonate aquifer of Mallorca, Spain. *Applied Geochemistry*. 39:1-10.

1026 Ghassemi F., Chen T.H., Jakeman A.J., Jacobson G., 1993. Two and three-dimensional simulation of  
1027 seawater intrusion: performances of the “SUTRA” and “HST3D” models. *AGSO J.*  
1028 *Aust.Geol.Geophys*. 14(2-3):219-226.

1029 Ghiglieri G., Carletti A., Pittalis D., 2012. Analysis of salinization processes in the coastal carbonate aquifer  
1030 of Porto Torres (NW Sardinia, Italy). *Journal of Hydrology*. 432-433:43-51.

1031 Giambastiani B.M.S., Antonellini M., Oude Essink G.H.P., Stuurman R.J., 2007. Saltwater intrusion in the  
1032 unconfined coastal aquifer of Ravenna (Italy): A numerical model. *Journal of Hydrology*. 340:91-104.

1033 Giménez-Forcada E., 2010. Dynamic of sea water interface using hydrochemical facies evolution diagram,

1034 Ground Water. 48, 212-216.

1035 Gingerich S., Voss C., 2002. Three-dimensional variable-density flow simulation of a coastal aquifer in  
1036 southern Oahu, Hawaii, USA, in Proceedings SWIM17 Delft 2002, edited by R. Boekelman,  
1037 pp.93-103, Delft Univ. of Technol., Delft, Netherlands.

1038 [Han D.M., Kohfahl C., Song X.F., Xiao G.Q., Yang J.L., 2011. Geochemical and isotopic evidence for  
1039 palaeo-seawater intrusion into the south coast aquifer of Laizhou Bay, China. Applied Geochemistry,  
1040 26\(5\):863-883.](#)

1041 [Han D.M., Song, X.F., Currell, M.J., Yang, J.L., Xiao G.Q. 2014. Chemical and isotopic constraints on the  
1042 evolution of groundwater salinization in the coastal plain aquifer of Laizhou Bay, China. Journal of  
1043 Hydrology 508: 12-27.](#)

1044 [Han D., Post V.E.A., Song X., 2015. Groundwater salinization processes and reversibility of seawater  
1045 intrusion in coastal carbonate aquifers. Journal of Hydrology. 531:1067-1080.](#)

1046 [Han, D., Song, X., Currell, M. 2016a Identification of anthropogenic and natural inputs of sulfate into a  
1047 karstic coastal groundwater system in northeast China: evidence from major ions,  \$\delta^{13}\text{C}\_{\text{DIC}}\$  and  \$\delta^{34}\text{S}\_{\text{SO}\_4}\$ .  
1048 Hydrology and Earth System Sciences 20\(5\): 1983-1999.](#)

1049 [Han, D., Currell, M.J., Cao, G. 2016b. Deep challenges for China's war on water pollution. Environmental  
1050 Pollution. 218: 1222-1233.](#)

1051 Han Z., 1988. Seawater intrusion into coastal porous aquifer- a case study of the alluvial plain of Yang  
1052 River and Dai River in Qinhuangdao City. China University of Geosciences, Beijing, China. (Chinese  
1053 with English abstract)

1054 Han Z., 1990. Controlling and harnessing of the seawater intrusion the alluvial plain of Yang River and Dai  
1055 River in Qinhuangdao. Geoscience (Journal of Graduate School, China University of Geosciences).  
1056 4(2):140-151. (Chinese with English abstract)

1057 Hebei Geology Survey, 1987. Report of regional geological and tectonic background in Hebei Province.  
1058 Internal materials.

1059 Hui G., 2009. Characteristics and formation mechanism of hydrochemistry of geothermal water in Danihe,  
1060 Funing District of Qinhuangdao region. Science & Technology Informaion. 9:762-763. (in Chinese)

1061 IAEA/WMO, 2006. Global Network of Isotopes in Precipitation. The GNIP Database, Vienna.  
1062 <[http://www-naweb.iaea.org/napc/ih/IHS\\_resources\\_gnip.html](http://www-naweb.iaea.org/napc/ih/IHS_resources_gnip.html)>.

1063 IPCC, Climate Change 2007: The Physical Science Basis, Contribution of Working Group I to the Fourth  
1064 Assessment Report of the Intergovernmental Panel on Climate Change, S. Solomon et al., Eds.  
1065 (Cambridge Univ. Press, Cambridge, 2007).

1066 Jiang A., Li D., 1997. Characteristics of shallow groundwater hydrochemistry modified by saltwater  
1067 intrusion in the south coast plain of Laizhou Bay. Acta Oceanologica Sinica.19(4):142-147. (in  
1068 Chinese)

1069 Jones B.F., Vengosh A., Rosenthal E. Yechieli Y., 1999. Geochemical investigations. In: Bear et al. (eds)  
1070 Seawater Intrusion in Coastal Aquifers - Concepts, Methods and Practices, pp51-72.

1071 Langevin C.D., Zygnerski M.R., White J.T., Hughes J.D., 2010. Effect of sea-level rise on future coastal  
1072 groundwater resources in southern Florida, USA. SWIM21-21st Salt Water Intrusion Meeting. Azores,  
1073 Portugal., June 21-26, 2010. Pp125-128.

1074 [Larsen, F., Tran, L.V., Hoang, H.V., Tran, L.T., Chistiansen, A.V., Pham, N.Q., 2017. Groundwater salinity  
1075 influenced by Holocene seawater trapped in the incised valleys in the Red River delta plain. Nature  
1076 Geoscience 10: 376-382.](#)

1077 [Lee, S., Currell, M., Cendon, D.I., 2016. Marine water from mid-Holocene sea level highstand trapped in a](#)

- 1078 | [coastal aquifer: Evidence from groundwater isotopes, and environmental significance. Science of the](#)  
1079 | [Total Environment. 544: 995-1007](#)
- 1080 Masterson J.P., 2004. Simulated interaction between freshwater and saltwater and effects of ground-water  
1081 pumping and sea-level change, Lower Cape Cod aquifer system, Massachusetts: U.S. Geological  
1082 Survey Scientific Investigations Report 2004-5014, 72 p.
- 1083 Mazi, K., Koussis, A.D., Destouni, G., 2014. Intensively exploited Mediterranean aquifers: proximity to  
1084 tipping points and control criteria for sea intrusion. *Hydrol. Earth Syst. Sci.* 18, 1663-1677.
- 1085 Meng F., 2004. Rational development of groundwater resources on the coastal zone of Qinhuangdao area.  
1086 *Marine Geology Letters.* 20(12):22-25. (Chinese with English abstract)
- 1087 | [Michael H.A., Post V.E.A., Wilson A.M., Werner A.D. 2017. Science, society and the coastal groundwater](#)  
1088 | [squeeze. Water Resources Research. 53. 2610-2617.](#)
- 1089 Mondal N.C., Singh V.P., Singh V.S., Saxena V.K., 2010. Determining the interaction between groundwater  
1090 and saline water through groundwater major ions chemistry. *Journal of Hydrology.* 388:100-111.
- 1091 Montenegro S.M.G, de A. Montenegro A.A., Cabral J.J.S.P., Cavalcanti G., 2006. Intensive exploitation  
1092 and groundwater salinity in Recife coastal plain (Brazil): monitoring and management perspectives.  
1093 Proceedings 1st SWIM-SWICA Joint Saltwater Intrusion Conference, Cagliari-Chia Laguna, Italy -  
1094 September 24-29, 2006. pp79-85.
- 1095 Moore W.S., 1996. Large groundwater inputs to coastal waters revealed by 226Ra enrichments. *Nature*  
1096 380,612-214.
- 1097 Narayan K.A., Schleeberger C., Bristow K.L., 2007. Modelling seawater intrusion in the Burdekin Delta  
1098 Irrigation Area, North Queensland, Australia. *Agricultural Water Management.* 89:217-228.
- 1099 Pan G., Yang Y., Zhang L., 1990. Survey report of geothermal water in Qinhuangdao city of Hebei Province.  
1100 Team of mineral hydrological and engineering geology from the Bureau of Geology and mineral  
1101 Resources of Hebei Province, China. (in Chinese)
- 1102 Parkhurst D.L., Appelo C.A.J., 1999. User's Guide to PHREEQC – A Computer Program for Speciation,  
1103 Reaction-Path, 1D-Transport, and Inverse Geochemical Calculation. US Geol. Surv. Water-Resour.  
1104 Invest. Rep. 99-4259.
- 1105 Post V.E.A., 2005. Fresh and saline groundwater interaction in coastal aquifers: Is our technology ready for  
1106 the problems ahead? *Hydrogeology Journal.* 13:120-123.
- 1107 Price R.M., Herman J.S., 1991. Geochemical investigation of salt-water intrusion into a coastal carbonate  
1108 aquifer: Mallorca, Spain. *Geological Society of America Bulletin.* 103:1270-1279.
- 1109 Pulido-Leboeuf P., 2004. Seawater intrusion and associated processes in a small coastal complex aquifer  
1110 (Castell de Ferro, Spain). *Applied Geochemistry.* 19:1517-1527.
- 1111 Radhakrishna I., 2001. Saline fresh water interface structure in Mahanadi delta region, Orissa, India.  
1112 *Environmental Geology.* 40(3):369-380.
- 1113 Rahmawati N., Vuillaume J., Purnama I.L.S., 2013. Salt intrusion in Coastal and Lowland areas of  
1114 Semarang City. *Journal of Hydrology.* 494:146-159.
- 1115 Robinson M.A., Gallagher D.L., Reay W.G., 1998. Field observations of tidal and seasonal variations in  
1116 ground water discharge to estuarine surface waters. *Ground Water Monitoring and Remediation.* 18  
1117 (1): 83-92.
- 1118 Shen Z., Zhu Y., Zhong Z., 1993. Theoretical basis of hydrogeochemistry. Geological Publishing House.  
1119 Beijing, China. (in Chinese)
- 1120 Sherif M.M., Singh V.P., 1999. Effect of climate change on sea water intrusion in coastal aquifers.  
1121 *Hydrological Processes* 13, 8:1277-1287.

1122 Shi M.Q., 2012. Spatial distribution of population in the low elevation coastal zone and assessment on  
1123 vulnerability of natural disaster in the coastal area of China. Master thesis of Shanghai Normal  
1124 University, 24–32.(Chinese with English abstract)

1125 Simpson, M.J., Clement, T.P., 2004. Improving the worthiness of the Henry problem as a benchmark for  
1126 density-dependent groundwater flow models. *Water Resources Research* 40 (1), W01504  
1127 doi:10.1029/2003WR002199.

1128 Sivan O., Yechieli Y., Herut B., Lazar B., 2005. Geochemical evolution and timescale of seawater intrusion  
1129 into the coastal aquifer of Israel. *Geochimica et Cosmochimica Acta*. 69(3):579-592.

1130 Smith A.J., Turner J.V., 2001. Density-dependent surface water-groundwater interaction and nutrient  
1131 discharge in the Swan-Canning Estuary. *Hydrological Processes*. 15:2595-2616.

1132 SOA (State Oceanic Administration of the People's Republic of China), 2015. China's Marine Environment  
1133 Bulletin: 2014. Released 11th March, (in Chinese).

1134 Sophocleus M., 2002. Interactions between groundwater and surface water: the state of science.  
1135 *Hydrogeology Journal*. 10:52-67.

1136 Sun J., Yang Y., 2007. Seawater intrusion characteristics in Qinhuangdao. *Journal of Environmental*  
1137 *Management College of China*. 17(2):51-54. (Chinese with English abstract)

1138 UN Atlas, 2010. UN Atlas: 44 Percent of us Live in Coastal Areas.  
1139 <<http://coastalchallenges.com/2010/01/31/un-atlas-60-of-us-live-in-the-coastal-areas/>>.

1140 Vengosh A., Gill J., Reyes A., Thoresberg K., 1997. A multi-isotope investigation of the origin of ground  
1141 water salinity in Salinas Valley, California. American Geophysical Union, San Francisco, California.

1142 Vengosh A., Pankratov I., 1998. Chloride/bromide and chloride/fluoride ratios of domestic sewage effluents  
1143 and associated contaminated ground water. *Ground Waer*. 36(5):815-824.

1144 [Vengosh A., Spivack A.J., Artzi Y., Ayalon A. 1999. Geochemical and boron, strontium, and oxygen  
1145 isotopic constraints on the origin of the salinity in groundwater from the Mediterranean coast of Isreal.  
1146 \*Water Resources Research\*. 35\(6\): 1877-1894.](#)

1147 [Walraevens, K., Cardenal-Escarcena, J., Van Camp, M., 2007. Reaction transport modelling of a freshening  
1148 aquifer \(Tertiary Ledo-Paniselian Aquifer, Flanders-Belgium\). \*Applied Geochemistry\*. 22: 289-305.](#)

1149 Wang, J., Yao, P., Bianchi, T.S., Li, D., Zhao, B., Cui, X., Pan, H., Zhang, T., Yu, Z., 2015. The effect of  
1150 particle density on the sources, distribution, and degradation of sedimentary organic carbon in the  
1151 Changjiang Estuary and adjacent shelf. *Chemical Geology*. 402:52-67.

1152 [Weber, K., Stewart, M., 2004. A critical analysis of the cumulative rainfall departure concept. \*Ground  
1153 Water\* 42 \(6\), 935–938.](#)

1154 Werner, A.D., 2010. A review of seawater intrusion and its management in Australia. *Hydrogeology Journal*.  
1155 18(1):281-285.

1156 Werner A.D., Bakker M., Post V.E.A., Vandenbohede A., Lu C., Ataie-Ashtiani B., Simmons C.T., Barry  
1157 D.A., 2013a. Seawater intrusion processes, investigation and management: Recent advances and  
1158 future challenges. *Advances in Water Resources*.51:3-26.

1159 Werner A.D., Simmons C.T., 2009. Impact of sea-level rise on seawater intrusion in coastal aquifers.  
1160 *Ground Water*. 47:197-204.

1161 Westbrook S.J., Rayner J.L., Davis G.B., Clement T.P., Bjerg P.L., Fisher S.J., 2005. Interaction between  
1162 shallow groundwater, saline surface water and contaminant discharge at a seasonally and tidally forced  
1163 estuarine boundary. *Journal of Hydrology*, 302:255-269.

1164 Wilhite D.A., 1993. Drought Assessment, Management, and Planning: Theory and Case Studies. Springer U  
1165 S. p628.

- 1166 Xu G., 1986. Analysis of seawater intruding into aquifer system in Beidaihe Region. *Hydrogeology &*  
 1167 *Engineering Geology*. 2:7-10. (in Chinese)
- 1168 Xue Y., Wu J., Xie C., Zhang Y., 1997. Study of seawater and saltwater intrusion in the coast plain of  
 1169 Laizhou Bay. *Chinese Science Bulletin*. 42(22):2360-2367. (in Chinese)
- 1170 Xue Y.Q., Wu J.C., Ye S.J., Zhang Y.X., 2000. Hydrogeological and hydrogeochemical studies for salt  
 1171 water intrusion on the South Coast of Laizhou Bay, China. *Ground Water*. 38, 38-45.
- 1172 Yang H., 1996. Sea-level changes in east China over the past 20000 years. in *Study of Environmental*  
 1173 *Change*. Hohai University Press. Nanjing, China. pp390-395.
- 1174 Yang L., 2011. Formation mechanism of bedrock fracture type-geothermal water in Qinhuangdao area.  
 1175 *West-china Exploration Engineering*. Urumchi, China. 10:151-152. (in Chinese)
- 1176 Yang Y., Gao S., Xie Y., 2008. Assessment and control countermeasures of seawater intrusion hazard on  
 1177 Qinhuangdao Region. *The Chinese Journal of Geological Hazard and Control*. 19(3):139-143.  
 1178 (Chinese with English abstract)
- 1179 Yang Y., He Q., Xie Y., Cao C., 1994. Grey model prediction of seawater intrusion of Qinhuangdao. *The*  
 1180 *Chinese Journal of Geological Hazard and Control*. 5(sup.):181-183. (Chinese with English abstract)
- 1181 Yechieli Y., Kafri U., Sivan O., 2009. The inter-relationship between coastal sub-aquifers and the  
 1182 Mediterranean Sea, deduced from radioactive isotopes analysis. *Hydrogeology Journal*. 17:265-274.
- 1183 Zang W., Liu W., Guo J., Zhang X., 2010. Geological hazards of seawater intrusion and its control  
 1184 measures in Qinhuangdao City, Hebei Province. *The Chinese Journal of Geological Hazard and*  
 1185 *Control*. 21(4):120-125. (Chinese with English abstract)
- 1186 Zeng J., 1991. Geochemistry of geothermal water in Qinhuangdao area, Hebei Province. *Bull. Institute of*  
 1187 *Hydrogeology and Engineering Geology, Chinese Academy of Geological Sciences*. 7:111-127.
- 1188 Zhang B., 2012. Mechanism of Seawater Intrusion Using Hydrochemistry and Environmental Isotopes in  
 1189 Qinhuangdao Yang Dai River Plain. Master's Thesis. Xiamen University, Fujian, China. (Chinese with  
 1190 English abstract)
- 1191 Zhang Q., Volker R.E., Lockington D.A., 2004. Numerical investigation of seawater intrusion at  
 1192 Gooburrum, Bundaberg, Queensland, Australia. *Hydrogeol. J.* 12 (6), 674-687.
- 1193 Zhang Z., Peng L., 1998. Groundwater hydrochemical characteristics on seawater intrusion in eastern and  
 1194 southern coasts of Laizhou Bay. *China Environmental Science*. 18(2):121-125.
- 1195 Zhuang Z., Liu D., Yang M., Li H., Qiu H., Ning P., Song W., Xu Z., 1999. The role of anthropogenic  
 1196 activities in the evolution of saline water intrusion processes. *Journal of Ocean University of Qingdao*.  
 1197 29(1):141-147. (Chinese with English abstract)
- 1198 Zuo W., 2006. Survey and Research on Seawater Intrusion in the Yandaihe Plain of Qinhuangdao City.  
 1199 Doctoral Thesis. China University of Geosciences, Beijing, China. (Chinese with English abstract)
- 1200 Zuo W., Yang Y., Dong Y., Liang M., 2009. The numerical study for seawater intrusion in Yanghe and  
 1201 Daihe coastal plain of Qinhuangdao City. *Journal of Natural Resources*. 24(12):2087-2095. (Chinese  
 1202 with English abstract)
- 1203
